# Supplementary material for: Changes in Gut Microbial Community of Pig Feces in Response to Different Dietary Animal Protein Media
Source: PubMed Central journal article supplement (PMC9728240; doi:10.4014/jmb.2003.03021), 2020-05-31
Supplement: JMB-30-9-1321-supple.pdf [file JMB-30-9-1321-supple.pdf]

Table S1. Relative abundance (%) of major OTU ID and prediction of similar species in different dietary animal protein media

| OTU ID  | Taxon                          | Similar species                     | Beef                    | Pork                    | Chicken                 | Milk                    | B_Feces                 | A_Feces                 | P.value   |
|---------|--------------------------------|-------------------------------------|-------------------------|-------------------------|-------------------------|-------------------------|-------------------------|-------------------------|-----------|
| 1111294 | f_Enterobacteriaceae; g__; s__ | <i>Shigella sp.</i>                 | 46.88±4.16 <sup>c</sup> | 44.31±4.62 <sup>c</sup> | 53.51±5.26 <sup>c</sup> | 51.18±4.76 <sup>c</sup> | 2.12±1.24 <sup>a</sup>  | 14.06±2.59 <sup>b</sup> | <0.001*** |
| 1039594 | f_Comamonadaceae; g__; s__     | <i>Curvibacter delicatus</i>        | 0.02±0.01 <sup>a</sup>  | 0.07±0.07 <sup>a</sup>  | 0.58±0.44 <sup>a</sup>  | 0.12±0.15 <sup>a</sup>  | 29.93±4.57 <sup>b</sup> | 29.03±2.75 <sup>b</sup> | <0.001*** |
| 349024  | g_Streptococcus                | <i>Streptococcus gallolyticus</i>   | 0.23±0.03 <sup>a</sup>  | 0.11±0.03 <sup>a</sup>  | 0.07±0.03 <sup>a</sup>  | 22.69±1.04 <sup>b</sup> | 0.04±0.01 <sup>a</sup>  | 0.04±0.01 <sup>a</sup>  | <0.001*** |
| 528753  | g_Phascolarctobacterium        | <i>Phascolarctobacterium faecum</i> | 2.74±1.01 <sup>b</sup>  | 3.99±0.57 <sup>bc</sup> | 5.35±1.65 <sup>c</sup>  | 0.04±0.02 <sup>a</sup>  | 0.27±0.1 <sup>a</sup>   | 0.19±0.11 <sup>a</sup>  | <0.001*** |
| 828483  | g_Clostridium                  | <i>Clostridium perfringens</i>      | 4.24±1.84 <sup>b</sup>  | 3.8±1.35 <sup>b</sup>   | 3.72±0.52 <sup>b</sup>  | 0.09±0.03 <sup>a</sup>  | 0.03±0.01 <sup>a</sup>  | 0.04±0.02 <sup>a</sup>  | <0.001*** |
| 4457268 | f_Enterobacteriaceae; g__; s__ | <i>Escherichia coli</i>             | 2.8±0.15 <sup>c</sup>   | 2.05±0.15 <sup>b</sup>  | 2.53±0.14 <sup>bc</sup> | 2.37±0.48 <sup>bc</sup> | 0.08±0.02 <sup>a</sup>  | 0.59±0.2 <sup>a</sup>   | <0.001*** |
| 1111582 | g_Enterococcus                 | <i>Enterococcus faecalis</i>        | 2.25±0.64 <sup>bc</sup> | 1.31±0.32 <sup>ab</sup> | 1.7±0.51 <sup>ac</sup>  | 3.23±1.44 <sup>c</sup>  | 0.04±0.01 <sup>a</sup>  | 0.09±0.06 <sup>a</sup>  | <0.001*** |
| 583656  | g_Bacteroides                  | <i>Bacteroides nordii</i>           | 0.92±0.62 <sup>ab</sup> | 1.47±0.57 <sup>ab</sup> | 2.56±0.47 <sup>b</sup>  | 0.25±0.15 <sup>a</sup>  | 1.76±0.95 <sup>ab</sup> | 2.02±0.83 <sup>ab</sup> | 0.013*    |
| 252727  | g_Peptostreptococcus           | <i>Peptostreptococcus russellii</i> | 1.68±2                  | 2.19±2.03               | 2.87±1.48               | 0.01±0.01               | 0.07±0.08               | 0.02±0.02               | 0.065     |
| 288521  | g_Lactobacillus                | <i>Lactobacillus equigenersi</i>    | 0.62±0.27               | 0.6±0.34                | 0.43±0.15               | 0.85±0.07               | 0.6±0.44                | 1.1±0.89                | 0.545     |
| 589277  | g_Bacteroides                  | <i>Bacteroides dorei</i>            | 0.15±0.09               | 0.19±0.05               | 0.16±0.01               | 0.09±0.03               | 2.58±2.41               | 1.01±0.16               | 0.055     |
| 1076969 | g_Streptococcus                | <i>Streptococcus agalactiae</i>     | 0.03±0.01 <sup>a</sup>  | 0.01±0 <sup>a</sup>     | 0±0 <sup>a</sup>        | 2.42±1.05 <sup>b</sup>  | 0±0 <sup>a</sup>        | 0±0 <sup>a</sup>        | <0.001*** |
| 537290  | g_Morganella                   | <i>Morganella morganii</i>          | 0.19±0.3                | 0.97±1.43               | 2.37±2.16               | 0.02±0.03               | 0.04±0.04               | 0.13±0.22               | 0.115     |
| 572889  | g_Fusobacterium                | <i>Fusobacterium mortiferum</i>     | 0.01±0 <sup>a</sup>     | 0±0 <sup>a</sup>        | 0±0 <sup>a</sup>        | 0±0 <sup>a</sup>        | 1.35±0.53 <sup>b</sup>  | 2.25±0.55 <sup>c</sup>  | <0.001*** |
| 851323  | g_Parabacteroides              | <i>Parabacteroides johnsonii</i>    | 0.2±0.12 <sup>a</sup>   | 0.29±0.12 <sup>ab</sup> | 0.33±0.07 <sup>ab</sup> | 0.07±0.02 <sup>a</sup>  | 1.38±0.41 <sup>c</sup>  | 0.77±0.12 <sup>b</sup>  | <0.001*** |
| 703741  | g_Lactobacillus                | <i>Lactobacillus acidophilus</i>    | 0.29±0.09 <sup>a</sup>  | 0.32±0.24 <sup>a</sup>  | 0.19±0.05 <sup>a</sup>  | 1.05±0.51 <sup>b</sup>  | 0.13±0.06 <sup>a</sup>  | 0.36±0.18 <sup>a</sup>  | 0.006**   |
| 604966  | g_Lactobacillus                | <i>Lactobacillus diolivorans</i>    | 0.34±0.08               | 0.33±0.14               | 0.23±0.04               | 0.67±0.12               | 0.13±0.13               | 0.51±0.51               | 0.132     |
| 585419  | g_Veillonella                  | <i>uclassified</i>                  | 0.02±0.01 <sup>a</sup>  | 0.09±0.06 <sup>ab</sup> | 0.69±0.54 <sup>b</sup>  | 0±0 <sup>a</sup>        | 0.01±0 <sup>a</sup>     | 0.03±0.01 <sup>a</sup>  | 0.015*    |
| 324786  | g_Veillonella                  | <i>Veillonella creceti / ratti</i>  | 0.03±0.01 <sup>a</sup>  | 0.12±0.08 <sup>ab</sup> | 0.22±0.08 <sup>b</sup>  | 0±0 <sup>a</sup>        | 0±0 <sup>a</sup>        | 0±0 <sup>a</sup>        | <0.001*** |

The data were expressed as the mean values±standard deviation. (SD)

The P.values were determined using Anova test. (\*P < 0.05; \*\*P < 0.01; \*\*\*P < 0.001)

<sup>a, b, c</sup> represents different superscripts differed significantly. (P < 0.05)

The major OTUs were arranged in order of abundance at each dietary animal protein medium.

**Table S2.** Sequences of OTUs and identities (%) with similar species

| OTU ID  | Taxon                              | Similar species              | Similarity (%) | Sequence                                                                                                                                                                                                                                                                                                                                                                                                                                                                                                                                                                                                                                                                                                                                                                                                                                                                                                                                                                                                                                                                                                                                                                                                                                                                                                                                                                                                                                                                                                                                                                                                                                                                                                                                                                                                                                                                                                                                                                                                                                                                                                                                                                                                                                                                                                                                                |
|---------|------------------------------------|------------------------------|----------------|---------------------------------------------------------------------------------------------------------------------------------------------------------------------------------------------------------------------------------------------------------------------------------------------------------------------------------------------------------------------------------------------------------------------------------------------------------------------------------------------------------------------------------------------------------------------------------------------------------------------------------------------------------------------------------------------------------------------------------------------------------------------------------------------------------------------------------------------------------------------------------------------------------------------------------------------------------------------------------------------------------------------------------------------------------------------------------------------------------------------------------------------------------------------------------------------------------------------------------------------------------------------------------------------------------------------------------------------------------------------------------------------------------------------------------------------------------------------------------------------------------------------------------------------------------------------------------------------------------------------------------------------------------------------------------------------------------------------------------------------------------------------------------------------------------------------------------------------------------------------------------------------------------------------------------------------------------------------------------------------------------------------------------------------------------------------------------------------------------------------------------------------------------------------------------------------------------------------------------------------------------------------------------------------------------------------------------------------------------|
| 1111294 | f__Enterobacteriaceae; g__:<br>s__ | <i>Shigella</i> sp.          | 97.01          | <p>AGAGTTTGATCCTGGCTCAGATTGAACGCTGGCGGACGGCCTAACACATGCAA<br/>                     GTCGAACGGTAACAGGAAACAGATTGCTGTTTCGCTGACGAGTGGCGGACGG<br/>                     GTGAGTAATGCTTGGGAAACTGCCTGATGGAGGGGGATAACTACTGAAAACG<br/>                     GTAGCTAATACCGCATAACGTCGCAAGACCAAAGAGGGGGACCCCTCGGGCCT<br/>                     CTTGCCATCGGATGTGCCAGATGGGATTAGCTTGTGGTGGGGTAACGGCTC<br/>                     AACACACAGGGGATCCGATCCCTAAGCTTGTCTGAGAGGACTGACCAGCCA<br/>                     CACGTGGAAGTACGACACGGTTCAGACTTCTACGGGAGGCAGCAGTGGGGAA<br/>                     TATTGCACAATGGGCGCAAGGCTGATGCAGGCATGCCGCTGTATGAAGAAG<br/>                     GCCTTCGGGTTGTAAGTACTTTACGACGGGAGGAAGGGAGTAAAGTAAATA<br/>                     CCTTTGCTCATTGACGTTACCCGCCAGAAGAAGCACC GGCTAACTCCGTGCCA<br/>                     GCAGCCCGGTAATACGGAGGGTGAAGCGTTAATCGGAATTACTGGGCGTA<br/>                     AAGCGCACGACGGCGGTTTGTAAAGTCAGATGTGAAATCCCGGGCTCAACCT<br/>                     GGAAGTGCATCTGATACTGGCAAGCTTGAGTCTCGTAGAGGGGGTGAAT<br/>                     TCCAGGTGTAGCGGTGAAATGCGTAGAGATCTGGAGGAATACCGGTGGCGAA<br/>                     GGCGGCCCTGGACGAAGACTGACGCTCAGGTGCGAAAGCGTGGGGAGCAA<br/>                     ACAGGATTAGATACCTGGTAGTCCACGCCGTAAACGATGTGACTTGGAGGT<br/>                     TGTGCCCTTGAGGCGTGGCTCCGGAGCTAACGCGTTAAGTCGACCCGCTGGA<br/>                     GGATGACGCCGCAAGGTTAAAACCTTAATGAATTGACCGGGGCCCGCAC<br/>                     AAGCGGTGGAGCATGTGCGTTAATTCGATGCAACGCGAAGAATGCTTACCTG<br/>                     GTCTTGACATCCACGGACGTTTTCGGAGATGTGAATGTGCTTCGGGAACCG<br/>                     TGAAGACAGGTAGCGTGATGGCTGTCGTCACTGCTCGTGTGTGAAATGTTG<br/>                     GTTTACGTCCGCAACGAGCTGCTATACCTCAGTGCTATACGCTTGTGTC<br/>                     AGCGGTCCGGCCGGAACTCAAAGGAGACTGCCAGTGATAAACTGGAGGAAG<br/>                     GTGGGGATGACGTCAAGTCATCATGGCCCTTACGACCAGGGCTACACACGTGC<br/>                     TACAATGGCGCATACAAAGAGAAGCGACCTCGCGAGAGCAAGCGGACCTCAT<br/>                     AAAGTGCCTGCTAGTCCGGATTGGAGTCTGCAACTCGACTCAAGTGGAGTGG<br/>                     ATCGCTAGTAATCGTGGATCAGAATGCCACGGTGAATACGTTCCCGGGCCTTG<br/>                     TACACACGCCCGTACACCATGGGAGTGGGTGCAAAAGAAGTAGGTAGCT<br/>                     TAACCTTCGGGAGGGCGCTTACCCTTTGTGATTGACTGCGGTGAAGTGC<br/>                     TAACAAGGTAGCCGT</p> |
| 1039594 | f__Comamonadaceae; g__:<br>s__     | <i>Curvibacter delicatus</i> | 97.2           | <p>ATTGAACGCTGGCGGCATGCCTTACACATGCAAGTCGAACGGCAGCACGGGA<br/>                     GCAATCCTGGTGGCGAGTGGCGAACGGGTGAGTAATACATCGGAACGTGCC<br/>                     GATCGTGGGGGATAACTACTCGAAAGAGTAGCTAATACCGCATAACGATCTAC<br/>                     GGATGAAAGCGGGGATCGCAAGACCTCGCGCGGACGGAGCGCCGATGGC<br/>                     AGATTAGGTAGTTGGTGGGATAAAAGCTTACCAAGCCGACGATCTGTAGCTG<br/>                     GTCTGAGAGGACGACCAGCCACACTGGGACTGAGACACGGCCAGACTCCTA<br/>                     CGGGAGGCAGCAGTGGGGAATTTGGACAATGGGCGAAAGCCTGATACAGCA<br/>                     ATGCCCGCTGCAGGATGAAGGCCTTCGGGTTGAAACTGCTTTTGTACGGAAC<br/>                     GAAAAGACTCTCTAATAAAAGGGGTCCATGACGGTACGCTAAGAATAAGC<br/>                     ACCGGCTAACTACGTGCCAGCAGCCGCGTAATACGTAGGGTGAAGCGTTA<br/>                     ATCGGAATTACTGGGCGTAAAGCGTGCAGCGGTTATGTAAGACAGAGGT<br/>                     GAAATCCCGGGCTCAACCTGGGAAGTGCCTTTGTGACTGCATAGCTAGAGTA<br/>                     CGGTAGAGGGGGATGGAATTCGCGTGTAGCAGTGAATGCGTAGATATGCG<br/>                     GAGGAACACCGATGGCGAAGGCAATCCCTGGACCTGTACTGACGCTCATGC<br/>                     ACGAAAGCGTGGGGAGCAAACAGGATTAGATACCTGGTGTAGTCCACGCCCTA<br/>                     ACGATGTCAACTGGTGTGGTCTTAACTGACTCAGTAACGAAGCTAACGC<br/>                     GTGAAGTTGACCGCTGGGAGTACGCGCCGAAGGTTGAAACTCAAAGGAAT<br/>                     TGACGGGGACCCGCAAGCGGTGGATGATGTGGTTTAAATTCGATGCAACGC<br/>                     GAAAAACCTTACCACCTTTGACATGTACGAGGTTTCCAGAGATGGATTGCT<br/>                     GCTCGAAAGAGAACCGTAACACAGGTGCTGCATGGCTGTGTCAGCTCGTGT<br/>                     GTGAGATGTTGGTAAAGTCCACAACGAGCGCAACCTTGCATTAGTTGCT<br/>                     ACATTTAGTTGGGCACTTAATGGGACTGCCGTTGACAAACCGGAGGAAGGT<br/>                     GGGGATGACGTCAAGTCTCATGGCCCTTATAGGTGGGGCTACACACGTGATA<br/>                     CAATGGCTGGTAAAGGGTTGCCAACCCGCGAGGGGGAGCTAATCCATAA<br/>                     AGCCAGTGTAGTCCGGATCGCAGTCTGCAACTCGACTGCTGGAAGTCCGAAT<br/>                     CGCTAGTAATCGTGGATCAGCATGCAGGTGAATACGTTCCCGGGTCT</p>                                                                                                                                                                                                                                                                                                 |

|        |                                 |                                      |       |                                                                                                                                                                                                                                                                                                                                                                                                                                                                                                                                                                                                                                                                                                                                                                                                                                                                                                                                                                                                                                                                                                                                                                                                                                                                                                                                                                                                                                                                                                                                                                                                                                                                                                                                                                                                                                                                                                                                                                                                                                                                                                                                                                                                                                                                                                                                                                                                                                                                                                                                                                                                                                                                                                                                                                                                                                                                                                                                                                                                                                                                                                                                                                                                                                 |
|--------|---------------------------------|--------------------------------------|-------|---------------------------------------------------------------------------------------------------------------------------------------------------------------------------------------------------------------------------------------------------------------------------------------------------------------------------------------------------------------------------------------------------------------------------------------------------------------------------------------------------------------------------------------------------------------------------------------------------------------------------------------------------------------------------------------------------------------------------------------------------------------------------------------------------------------------------------------------------------------------------------------------------------------------------------------------------------------------------------------------------------------------------------------------------------------------------------------------------------------------------------------------------------------------------------------------------------------------------------------------------------------------------------------------------------------------------------------------------------------------------------------------------------------------------------------------------------------------------------------------------------------------------------------------------------------------------------------------------------------------------------------------------------------------------------------------------------------------------------------------------------------------------------------------------------------------------------------------------------------------------------------------------------------------------------------------------------------------------------------------------------------------------------------------------------------------------------------------------------------------------------------------------------------------------------------------------------------------------------------------------------------------------------------------------------------------------------------------------------------------------------------------------------------------------------------------------------------------------------------------------------------------------------------------------------------------------------------------------------------------------------------------------------------------------------------------------------------------------------------------------------------------------------------------------------------------------------------------------------------------------------------------------------------------------------------------------------------------------------------------------------------------------------------------------------------------------------------------------------------------------------------------------------------------------------------------------------------------------------|
| 349024 | <i>g_Streptococcus</i>          | <i>Streptococcus gallolyticus</i>    | 95.68 | <p>AGAGTTTGATCCTGGCTCAGGATGAACGCTGGCGGCGTGCCTAATACATGCAA<br/> GTCGAACGCACAGCGAAAGGTGCTTGACCTTTCAAGTGAGTGGCGAACGGG<br/> TGAGTAACACGTGGATAACCTACCTCAAGGTTGGGGATAACATTTGAAAAACA<br/> GATGCTAATACCGAATAAACTTTCGTATCGCATGATACAAGGTTAAAAGCGC<br/> CTACGGCGTCACCTAGAGATGGATCCGCGTTGTATTAGCTAGTTGGTGGGGTA<br/> ACGGCCTACCAAGCGGACGATACATAGCCGACCTGAGAGGGTGATCGGCCAC<br/> ACTGGGACTGAGACACGGCCAGACTCCTACGGGAGGCAGCAGTAGGGAATC<br/> TTCGGCAATGGGGGCAACCTGACCGAGCAACGCCGCGTGAGTGAAGAAGGT<br/> TTTCGGATCGTAAAGCTCTGTTGTAAGAGAAGAACGTGTATGAGAGTGAAAA<br/> GTTACACAGTGACGGTAACCTACCAGAAAGGGACGGTAACCTACGTGCCAG<br/> CAGCCGCGTAATACGTAGGTCGCCAGCGTTGTCCGGATTTATTGGGCGTAAA<br/> GCGAGCGCAGGCGGTTAATAAGTCTGAAGTTAAAGGCAGTGGCTTAACCAT<br/> GTTTCGCTTTGGAACTGTTAAACTTGAGTGCAGAAAGGGGAGAGTGAATTCCA<br/> TGTGTAGCGGTGAAATGCGTAGATATATGGAGGAACACCGGTGGCGAAAGCG<br/> GCTCTCTGGTCTGTAACGTGACGCTGAGGCTCGAAAGCGTGGGGAGCAAACAG<br/> GATTAGATACCTTGGTAGTCCACGCCGTAACAGATGAGTGTAGGTGTTAGGC<br/> CCTTTCGGGGCTTAGTGCCGACGCTAACGCATTAAGCATTACCGCTGGGGAG<br/> TACGACCGCAAGGTTGAACTCAAAGGAATTGACGGGGGCCCGCACAAAGCGG<br/> TGGAGCATGTGGTTAATTTCGAAGCAACGCGAAGAACCTTACCAGGTCTTGAC<br/> ATCCCGATGCTATTTCTAGAGATAGAAAGTTTCTTCGGAACATCGGTGACAGG<br/> TGGTGCATGGTTGCTCAGCTCGTGTCTGAGATGTTGGGTTAAGTCCCGCA<br/> ACGAGCGCAACCCCTATTGTTAGTTGCCATCATTGAGTTGGGCACTCTAGCGA<br/> GACTGCCGTAATAAACCGGAGGAAGGTGGGGATGACGTCAAATCATCATGC<br/> CCATTATGACCTGGGCTACACACGTGCTACAATGGTTGGTACAACGAGTGCGA<br/> AGTCCGTGACGGCAAGCAAATCTCTTAAAGCCAATCTCAGTCCGGATTGTAGG<br/> CTGCAACTCGCCTACATGAAGTCGGAATCGCTAGTAATCGCGGATCAGCACGC<br/> CGCGGTGAATACGTTCCCGGCCCTTGCACTACCCGCCGCTCA</p> <p>GAGTTTGATCCTGGCTCAGGACGAACGCTGGCGGCGTGCCTAACACATGCAA<br/> GTCGAACGAGAAATTTATTTTCGGTAGGATTTCTAGTGGCGAACGGGTGAGTA<br/> ACGCGTAGGCAACCTGCCCTTTAGACGGGACAACATTCGAAAGGAGTGCTA<br/> ATACCGGATGAGATCATTTCGCCATAGGAGAGTGAAGAAAGATGGCCCTCT<br/> ACATGTAAGCTATCGCTAAAGGATGGGCTGCGTCTGATTAGCTAGTTGGTAG<br/> TGTAACGGACTACCAAGCGATGATCAGTAGCCGCTGAGAGGATGAACGG<br/> CCACATTGGGACTGAGACACGGCCAAACTCCTACGGGAGGCAGCAGTGGGG<br/> AATCTTCCGCAATGGACGAAAGTCTGACGGAGCAACGCCGCGTGAGTGATGA<br/> AGGATTTCCGGTCTGTAATACTCTGTTGTTATGACGAACGTGCAGTGTGTGAA<br/> CAATGCATTGCAATGACGGTAGTAAACGAGGAAGCCACGGTAACCTACGTGC<br/> CAGCAGCCGCGTAATACGTAGGTGGCGAGCGTCTGCCGAAATTATTGGGCG<br/> TAAAGAGCATGTAGCGGCCCTATTAAGTCGAGCGTGAATAATGCGGGGCTCAA<br/> CCCCGATGGCGCTGGAACCTGGTAGGCTTGAGTGCAGGAGAGGAAAGGGGA<br/> ATTCCCAGTGTAGCGGTGAAATGCGTAGATATTGGGAGGAACACCAGTGGCG<br/> AAGGCGCCTTTCTGGACTGTGTCTGACGCTGAGATGCGAAAGCCAGGGTAGC<br/> GAACGGGATTAGATACCCCGTAGTCTGGCCGTAACGATGGGTACTAGGT<br/> GTAGGAGGTATCGACCCCTTCTGTGCCGGAGTTAACGCAATAAGTACCCCGC<br/> TGGGGAGTACGGCCGCAAGGTTGAACTCAAAGGAATTGACGGGGGCCCGCA<br/> CAAGCGGTGGAGTATGTGGTTAATTTCGACGCAACGCGAAGAACCTTACCAA<br/> GGCTTGACATTGATTGATCGCTCTAGAGATAGAGCTTTCCCTTCGGGGACAAG<br/> AAAACAGGTGGTGCATGGCTGTCTGCTAGCTCGTGTCTGAGATGTTGGGTTAA<br/> GTCCCGCAACGAGCGCAACCCCTATCCTATGTTACCAGCAAGTGAAGTTGGGG<br/> ACTCATGGGAGACTGCCAGGACAACCTGGAGGAAGGCGGGGATGACGTCAA<br/> GTCATCATGCCCTTATGTCTTGGGCTACACACGTAACAATGGTCGGAAC<br/> AGAGGGAAGCAAAGCCGCGAGGCAGAGCAAACCCAGAAACCCGATCTCAG<br/> TTCGGATCGCAGGCTGCAACTCGCCTGCGTGAAGTCGGAATCGCTAGTAATCG<br/> CAGGTACGATACTGCGGTGAATACGTTCCCGGCCCTTG</p> |
| 528753 | <i>g_Phascalarectobacterium</i> | <i>Phascalarectobacterium faceum</i> | 98.57 | <p>GAGTTTGATCCTGGCTCAGGACGAACGCTGGCGGCGTGCCTAACACATGCAA<br/> GTCGAACGAGAAATTTATTTTCGGTAGGATTTCTAGTGGCGAACGGGTGAGTA<br/> ACGCGTAGGCAACCTGCCCTTTAGACGGGACAACATTCGAAAGGAGTGCTA<br/> ATACCGGATGAGATCATTTCGCCATAGGAGAGTGAAGAAAGATGGCCCTCT<br/> ACATGTAAGCTATCGCTAAAGGATGGGCTGCGTCTGATTAGCTAGTTGGTAG<br/> TGTAACGGACTACCAAGCGATGATCAGTAGCCGCTGAGAGGATGAACGG<br/> CCACATTGGGACTGAGACACGGCCAAACTCCTACGGGAGGCAGCAGTGGGG<br/> AATCTTCCGCAATGGACGAAAGTCTGACGGAGCAACGCCGCGTGAGTGATGA<br/> AGGATTTCCGGTCTGTAATACTCTGTTGTTATGACGAACGTGCAGTGTGTGAA<br/> CAATGCATTGCAATGACGGTAGTAAACGAGGAAGCCACGGTAACCTACGTGC<br/> CAGCAGCCGCGTAATACGTAGGTGGCGAGCGTCTGCCGAAATTATTGGGCG<br/> TAAAGAGCATGTAGCGGCCCTATTAAGTCGAGCGTGAATAATGCGGGGCTCAA<br/> CCCCGATGGCGCTGGAACCTGGTAGGCTTGAGTGCAGGAGAGGAAAGGGGA<br/> ATTCCCAGTGTAGCGGTGAAATGCGTAGATATTGGGAGGAACACCAGTGGCG<br/> AAGGCGCCTTTCTGGACTGTGTCTGACGCTGAGATGCGAAAGCCAGGGTAGC<br/> GAACGGGATTAGATACCCCGTAGTCTGGCCGTAACGATGGGTACTAGGT<br/> GTAGGAGGTATCGACCCCTTCTGTGCCGGAGTTAACGCAATAAGTACCCCGC<br/> TGGGGAGTACGGCCGCAAGGTTGAACTCAAAGGAATTGACGGGGGCCCGCA<br/> CAAGCGGTGGAGTATGTGGTTAATTTCGACGCAACGCGAAGAACCTTACCAA<br/> GGCTTGACATTGATTGATCGCTCTAGAGATAGAGCTTTCCCTTCGGGGACAAG<br/> AAAACAGGTGGTGCATGGCTGTCTGCTAGCTCGTGTCTGAGATGTTGGGTTAA<br/> GTCCCGCAACGAGCGCAACCCCTATCCTATGTTACCAGCAAGTGAAGTTGGGG<br/> ACTCATGGGAGACTGCCAGGACAACCTGGAGGAAGGCGGGGATGACGTCAA<br/> GTCATCATGCCCTTATGTCTTGGGCTACACACGTAACAATGGTCGGAAC<br/> AGAGGGAAGCAAAGCCGCGAGGCAGAGCAAACCCAGAAACCCGATCTCAG<br/> TTCGGATCGCAGGCTGCAACTCGCCTGCGTGAAGTCGGAATCGCTAGTAATCG<br/> CAGGTACGATACTGCGGTGAATACGTTCCCGGCCCTTG</p>                                                                                                                                                                                                                                                                                                                                                                                                                                                                                                                                                                                                                                                                                                                                                                                                                                                                                                                                                                                                                                                                                                                                                                                                                                                                                                                                                                                                                                                                                                                                                                                                                          |

|         |                                      |                                |       |                                                                                                                                                                                                                                                                                                                                                                                                                                                                                                                                                                                                                                                                                                                                                                                                                                                                                                                                                                                                                                                                                                                                                                                                                                                                                                                                                                                                                                                                                                                                                                                                                                                                                                                                                                                                                                                                                                                                                                                                                                                                                                                                                                                                                                                                                                                                                                                                                                                                                                                                                                                                                                                                                                                                                                                                                                                                                                                                                                                                                                                                                                                                                                                                                                                                                                                                             |
|---------|--------------------------------------|--------------------------------|-------|---------------------------------------------------------------------------------------------------------------------------------------------------------------------------------------------------------------------------------------------------------------------------------------------------------------------------------------------------------------------------------------------------------------------------------------------------------------------------------------------------------------------------------------------------------------------------------------------------------------------------------------------------------------------------------------------------------------------------------------------------------------------------------------------------------------------------------------------------------------------------------------------------------------------------------------------------------------------------------------------------------------------------------------------------------------------------------------------------------------------------------------------------------------------------------------------------------------------------------------------------------------------------------------------------------------------------------------------------------------------------------------------------------------------------------------------------------------------------------------------------------------------------------------------------------------------------------------------------------------------------------------------------------------------------------------------------------------------------------------------------------------------------------------------------------------------------------------------------------------------------------------------------------------------------------------------------------------------------------------------------------------------------------------------------------------------------------------------------------------------------------------------------------------------------------------------------------------------------------------------------------------------------------------------------------------------------------------------------------------------------------------------------------------------------------------------------------------------------------------------------------------------------------------------------------------------------------------------------------------------------------------------------------------------------------------------------------------------------------------------------------------------------------------------------------------------------------------------------------------------------------------------------------------------------------------------------------------------------------------------------------------------------------------------------------------------------------------------------------------------------------------------------------------------------------------------------------------------------------------------------------------------------------------------------------------------------------------------|
| 828483  | <i>g__Clostridium</i>                | <i>Clostridium perfringens</i> | 100   | <p>TTGATCCTGGCTCAGGATGAACGCTGGCGGCGTGCTTAACACATGCAAGTCGA<br/> GCGAGAGAGTTCCCTTCGGGAACAATCTAGCGGCGGACGGGTGAGTAACACGT<br/> GGGCAACCTGCCTCATAGAGGGGAATAGCCTCCCGAAAAGGGAGATTAATACC<br/> GCATAATATCATTGAGTGGCATCATTTAATGATTAAGGAGTAATCCGCTATG<br/> AGATGGGCCCGCGGCGCATTAGCTAGTTGGTGAGGTAACGGCTACCAAGGC<br/> GACGATGCGTAGCCGACCTGAGAGGGTGATCGGCCACATTGGGACTGAGACA<br/> CGGCCAGACTCCTACGGGAGGCAGCAGTGGGGAATATTGCACAATGGGGGA<br/> AACCTGATGCAGCAACGCCGCGTGAGTGATGAAGGTCTTCGGATTGTAAG<br/> CTCTGTCTTCAGGGACGATAATGACGGTACCTGAGGAGGAAGCCACGGCTAA<br/> CTACGTGCCAGCAGCCGCGTAATACGTAGGTGGCAAGCGTTATCCGGATTTA<br/> CTGGGCGTAAAGGGAGCGTAGGCGGATAATTAAGTGGGATGTGAAATACCCG<br/> GGCTCAACTGGGTGCTGCATTCCAAACTGGTTATCTAGAGTGCAGGAGAGGA<br/> GAGTGGAATTCCTAGTGTAGCGGTGAAATGCGTAGAGATTAGGAAGAACC<br/> AGTGGCGAAGGCGACTCTCTGGACTGTAAGTACGCTGAGGCTCGAAAGCGT<br/> GGGAGCAAACAGGATTAGATACCCTGGTAGTCCACCGGTAAACGATGAAT<br/> ACTAGGTGTAGGGGCCCAAGCCTCTGTGCCCGCTAACGCATTAAGTATTC<br/> CGCTGGGAGTACGGTCGCAAGATTAAGCTCAAAGGAATTGACGGGGACC<br/> CGACAAGCAGCGGAGCATGTGGTTAATTCGAAGCAACGCGAAGAACCCTTA<br/> CCTAGACTTGACATCTCCTGAATTACTCTTAATCGAGGAAGCTTCGGTGA<br/> CAGGAAGACAGGTGGTGCATGGTTGTCGTCAGCTCGTGTGCTGATGTTGG<br/> TTAAGTCCCGCAACGAGCGCAACCCTTATTGTTAGTTGCTACCATTAAGTTGA<br/> GCACTCTAGCAAGACTGCCGGGTAAACCGGGAGGAAGGTGGGGATGACGTC<br/> AAATCATATGCCCTTATGTCTAGGGCTACACACGTGCTACAATGGCAAGTA<br/> CAAAGAGAAGCAAGACCGCAAGGTGGAGCAAACTCAAAAACCTTGTCTCAGT<br/> TCGGATTGTAGGCTGAAACTCGCCTACATGAAGCTGGAGTTGCTAGTAATCCG<br/> GAATCAGCATGTCCGCGTGAATACGTTCCCGGGTCTGTACACACCCCGCTC<br/> ACCCATGAGAGTTGGCAATACCCGAAGTCCGTGAGCTAACCCGAAGGAGGC<br/> AGCGGCCGAAGGTAGGGTCAGCGATTGGGGTGAAGTCGTAACAAGGTAGCCG<br/> TAGGAGAACCTGCGGCTGGATCACCTCCTT</p> <p>GGTAACAGGAAAGAAGCTTGCTTTCTTTGCTGACGAGTGGCGGACGGGTGAG<br/> TAATGTCTGGGAAACTGCCTGATGGAGGGGATAACTACTGGAACGGTAGC<br/> TAATACCGCATAACGTCGCAAGACCAAAGAGGGGGACCTTCGGGCTCTTGC<br/> CATCGGATGTGCCAGATGGGATTAGCTAGTAGGTGGGGTAACGGCTCACCTA<br/> GGCGACGATCCCTAGCTGGTCTGAGAGGATGACCAGCCACACTGGAAGTGA<br/> ACACGGTCCAGACTCCTACGGGAGGCAGCAGTGGGGAATATTGCACAATGGG<br/> CGCAAGCCTGATGCAGCCATGCCGCGTGTATGAAGAAGGCCTTCGGGTTGTAA<br/> AGTACTTTCAGCGGGGAGGAAGGGAGTAAAGTTAATACCTTTGCTCATTGACC<br/> TTACCCGAGAAGAAGCACCGGCTAACTCCGTGCCAGCAGCCCGGGTAATA<br/> CGGAGGGTGCAAGCGTTAATCGGAATTACTGGGCGTAAAGCGCACGAGGGC<br/> GTTTTGTTAAGTCAGATGTGAAATCCCGGGCTCAAACCTGGGAAGTGCATCT<br/> GATACTGGCAAGCTTTGAGTCTCGTAGAGGGGGGTAGAATTCCAGGTGTAGC<br/> GGTGAATGCGTAGAGATCTGGAGGAATACCGTGGCGAAGGCGGCCCTCTG<br/> GACGAAGACTGACGCTCAGGTGCGAAAAGCGTGGGAGCAAAACAGGATTAGAT<br/> ACCCTGGTAGTCCACGCCGTAACGATGTGCACTTGGAGGTTGTGCCCTTGG<br/> GCGTGGCTTCCGGAGCTAACCGCTTAAGTCGACCCCTGGGGAGTACGGCCC<br/> GCAAGGTTAAAACCTCAAATGAATTGACGGGGGGCCCGCACAAGCGGTGGAG<br/> CATGTGGTTAATTTCGATGCAACGCGAAGAACCTTACCTGGGTCTTGACATCC<br/> ACAGNAACCTTCCAGAAAATGGATTGGGTGCCTTCGGGAAGTGTGAGACAGG<br/> TGCTGCATGGCTGTCGTTACCTCGTGTGTGAAATGTTGGGTTAAGTCCCGCA<br/> ACGAGCGCAACCCTTATCCTTTGTTGCCAGCGGTCCGGCCGGGAAGTCAAAGG<br/> AACTGCCAGTGATAAACTGGAGGAAGGTGGGATGACGTCAGTCAATGATCATG<br/> GCCCTTACGACAGGGCTACACACGTGCTACAATGGCGCATACAAAGAGAAG<br/> CGACCTCGGAGAGCAAGCGGACCTATAAAGTGCCTGCTAGTCCGGATTGG<br/> AGTCTGCAACTCGACTCCATGAAGTCGGAATCGCTAGTAATCGTGGATCAGAA<br/> TGCCACGGTGAATACGTTCCCGGCCTTGTACACACCCCGCTCACACCATGG<br/> GAGTGGGTTGCAAAAGAAGTAGGTAGGCTTAACCTTCGGGAGGGGCGCTAC<br/> CAC</p> |
| 4457268 | <i>f__Enterobacteriaceae; g__s__</i> | <i>Escherichia coli</i>        | 98.59 | <p>GGTAACAGGAAAGAAGCTTGCTTTCTTTGCTGACGAGTGGCGGACGGGTGAG<br/> TAATGTCTGGGAAACTGCCTGATGGAGGGGATAACTACTGGAACGGTAGC<br/> TAATACCGCATAACGTCGCAAGACCAAAGAGGGGGACCTTCGGGCTCTTGC<br/> CATCGGATGTGCCAGATGGGATTAGCTAGTAGGTGGGGTAACGGCTCACCTA<br/> GGCGACGATCCCTAGCTGGTCTGAGAGGATGACCAGCCACACTGGAAGTGA<br/> ACACGGTCCAGACTCCTACGGGAGGCAGCAGTGGGGAATATTGCACAATGGG<br/> CGCAAGCCTGATGCAGCCATGCCGCGTGTATGAAGAAGGCCTTCGGGTTGTAA<br/> AGTACTTTCAGCGGGGAGGAAGGGAGTAAAGTTAATACCTTTGCTCATTGACC<br/> TTACCCGAGAAGAAGCACCGGCTAACTCCGTGCCAGCAGCCCGGGTAATA<br/> CGGAGGGTGCAAGCGTTAATCGGAATTACTGGGCGTAAAGCGCACGAGGGC<br/> GTTTTGTTAAGTCAGATGTGAAATCCCGGGCTCAAACCTGGGAAGTGCATCT<br/> GATACTGGCAAGCTTTGAGTCTCGTAGAGGGGGGTAGAATTCCAGGTGTAGC<br/> GGTGAATGCGTAGAGATCTGGAGGAATACCGTGGCGAAGGCGGCCCTCTG<br/> GACGAAGACTGACGCTCAGGTGCGAAAAGCGTGGGAGCAAAACAGGATTAGAT<br/> ACCCTGGTAGTCCACGCCGTAACGATGTGCACTTGGAGGTTGTGCCCTTGG<br/> GCGTGGCTTCCGGAGCTAACCGCTTAAGTCGACCCCTGGGGAGTACGGCCC<br/> GCAAGGTTAAAACCTCAAATGAATTGACGGGGGGCCCGCACAAGCGGTGGAG<br/> CATGTGGTTAATTTCGATGCAACGCGAAGAACCTTACCTGGGTCTTGACATCC<br/> ACAGNAACCTTCCAGAAAATGGATTGGGTGCCTTCGGGAAGTGTGAGACAGG<br/> TGCTGCATGGCTGTCGTTACCTCGTGTGTGAAATGTTGGGTTAAGTCCCGCA<br/> ACGAGCGCAACCCTTATCCTTTGTTGCCAGCGGTCCGGCCGGGAAGTCAAAGG<br/> AACTGCCAGTGATAAACTGGAGGAAGGTGGGATGACGTCAGTCAATGATCATG<br/> GCCCTTACGACAGGGCTACACACGTGCTACAATGGCGCATACAAAGAGAAG<br/> CGACCTCGGAGAGCAAGCGGACCTATAAAGTGCCTGCTAGTCCGGATTGG<br/> AGTCTGCAACTCGACTCCATGAAGTCGGAATCGCTAGTAATCGTGGATCAGAA<br/> TGCCACGGTGAATACGTTCCCGGCCTTGTACACACCCCGCTCACACCATGG<br/> GAGTGGGTTGCAAAAGAAGTAGGTAGGCTTAACCTTCGGGAGGGGCGCTAC<br/> CAC</p>                                                                                                                                                                                                                                                                                                                                                                                                                                                                                                                                                                                                                                                                                                                                                                                                                                                                                                                                                                                                                                                                                                                                                                                                                                                                                                                                                                                                                                                                                                                                                                                                                                                                                                             |

|         |                        |                              |       |                                                                                                                                                                                                                                                                                                                                                                                                                                                                                                                                                                                                                                                                                                                                                                                                                                                                                                                                                                                                                                                                                                                                                                                                                                                                                                                                                                                                                                                                                                                                                                                                                                                                                                                                                                                                                                                                                                                                                                                                                                                                                                                                                                                                                                                                                                                                                                                                                                                                                                                                                                                                                                                                                                                                                                                                                                                                                                                                                                                                                                                                                                                                                                    |
|---------|------------------------|------------------------------|-------|--------------------------------------------------------------------------------------------------------------------------------------------------------------------------------------------------------------------------------------------------------------------------------------------------------------------------------------------------------------------------------------------------------------------------------------------------------------------------------------------------------------------------------------------------------------------------------------------------------------------------------------------------------------------------------------------------------------------------------------------------------------------------------------------------------------------------------------------------------------------------------------------------------------------------------------------------------------------------------------------------------------------------------------------------------------------------------------------------------------------------------------------------------------------------------------------------------------------------------------------------------------------------------------------------------------------------------------------------------------------------------------------------------------------------------------------------------------------------------------------------------------------------------------------------------------------------------------------------------------------------------------------------------------------------------------------------------------------------------------------------------------------------------------------------------------------------------------------------------------------------------------------------------------------------------------------------------------------------------------------------------------------------------------------------------------------------------------------------------------------------------------------------------------------------------------------------------------------------------------------------------------------------------------------------------------------------------------------------------------------------------------------------------------------------------------------------------------------------------------------------------------------------------------------------------------------------------------------------------------------------------------------------------------------------------------------------------------------------------------------------------------------------------------------------------------------------------------------------------------------------------------------------------------------------------------------------------------------------------------------------------------------------------------------------------------------------------------------------------------------------------------------------------------------|
| 1111582 | <i>g__Enterococcus</i> | <i>Enterococcus faecalis</i> | 95.99 | <p>AGAGTTTGATCATGGCTCAGGATGAACGCTGGCGGCGTGCCCTAATACATGCAA<br/> GTCGAGCGAACAGACGAGGAGCTTGCTCCTTTGACGTTAGCGGCGGACGGGT<br/> GAGTAACACGTGGATAACCTACCTATAAGACTGGGATAAATTCGGGAAACCG<br/> GAGCTAATACCGGATAACATGTTGAACCGCATGGTTCAACAGTGAAAGACGG<br/> TCTTGTCTCACTTATAGATGGATCCGCGCCGATTAGCTAGTTGGTGAGGTA<br/> ACGGCTCACCAAGGCCACGATGCATAGCCGACCTGAGAGGGTGATCGGCCAC<br/> ACTGGGACTGAGACACGGCCAGACTCCTACGGGAGGCACGATAGGGAATC<br/> TTCGGCAATGGACGAAAGTCTGACCGAGCAACGCCGCGTGAGTGAAGAAGGT<br/> TTTCGGATCGTAAAACCTCTGTTGTTAGAGAAGAACAAGGACGTTAGTAACTGA<br/> ACGTCCCCTGACGGTATCTAACCAGAAAGCCACGGCTAACTACGTGCCAGCA<br/> GCCGCGTAATACGTAGGTGGCAAGCGTTGTCCGATTATTGGGCGTAAAGA<br/> GAGCGCAGGCGGTTTCTTAAGTCTGATGTGAAAGCCCCCGGCTCAACCGGGG<br/> AGGGTCATTGAAAACCTGGGAGACTTGAGTGCAGAAGAGGAGAGTGGAAATCC<br/> ATGTGTAGCGGTGAAAATGCGTAGATATATGGAGGAACACCAGTGGCGAAGGC<br/> GGCTCTCTGGTCTGTAACCTGACGCTGAGGCTCGAAAGCGTGGGGAGCAAACA<br/> GGATTAGATACCCTGGTAGTCCACGCCGTAACGATGAGTGTAAAGTGTGGAA<br/> GGGTTCCGCCCTTCAGTGTGACGAAACGCATTAAGCACTCCGCTGGGGGA<br/> GTACGACCGCAAGGTTGAACTCAAAGGAATTGACGGGGGCCCGACAAGCG<br/> GTGGAGCATGTGGTTAATTCGAAGCAACGGAAGAACCTTAAGTGTGGAACTGA<br/> CATCCTTTGACCACTCTAGAGATAGAGCTTCCCTTCGGGGACAAAAGTGACAG<br/> GTGGTGCATGGTTGTCTGTCAGCTCGTGTCTGAGATGTTGGGTTAAGTCCCGC<br/> AACGAGCGCAACCCCTATTGTTAGTTGCCATCATTTAGTTGGGCACTCTAGCG<br/> AGACTGCCGGTGACAAACCGGAGGAAGTGGGGATGACGTCAAATCATCATG<br/> CCCCATTAGACCTGGGCTACACACGTGTACAATGGGAAGTACAACAGCTCGC<br/> TAGACCGGAGGTCATGCAAATCTCTTAAAGCTTCTCTCAGTTCGGATTGCAG<br/> GCTGCAACTCGCCTGCATGAAGCCGGAATCGTAGTAATCGCGGATCAGCAC<br/> GCCGCGGTGAATACGTTCCCG<br/> CTGGCTCAGGATGAACGCTAGCTACAGGCTTAACACATGCAAGTCGAGGGGC<br/> ATCAGGATGTAGCAATACATTGCTGCGACCGGCGCACGGGTGAGTAACACGT<br/> ATCCAACCTGCCTTTACTCGGGGATAGGCTTTTCGAAAGAAAGATTAAATACC<br/> GATGGTATAATATTTCCGCATGGGATTATTATTAAGAATTTCCGGTAAAAGGT<br/> GGGGATGCGTTCCATTAGGCAGTTGGCGGGTAACGGCCCAACCAACCTTCG<br/> ATGGATAGGGGTTCTGAGAGGAAGGTCCCCACATTGGAAGTGAACACGGT<br/> CCAAACTCCTACGGGAGGCAGCAGTGAGGAATATTGGTCAATGGGCGAAAGC<br/> CTGAACCAGCCAAGTAGCGTGAAGGATGACTGCCCTATGGGTTGTAACCTTCT<br/> TTTATAGGGGAATAAAAATGAGCCACGTGTGGCTTTTGTATGTACCCTATGAA<br/> TAAGGATCGGCTAACTCCGTGCCAGCAGCCGCGTAATACGGAGGATCCGAG<br/> CGTTATCCGGATTTATTGGGTTTAAAGGGAGCGTAGGTGGACATGTAAGTCAG<br/> TTGTGAAAAGTTTGGCGCTAACCGTAAAATTGCAGTTGATACTGTGTGTCTTG<br/> AGTACAGTAGAGGTGGGCGAATTCGTGGTGTAGCGGTGAAATGCTTAGATA<br/> TCACGAAGAACTCCGATTGCGAAGGCAGCTCACTGGACTGCAACTGACACTG<br/> ATGCTCGAAAGTGTGGGTATCAAACAGGATTAGATACCTGGTAGTCCACACA<br/> GTAACGATGAATACTCGTGTGTTGCGATATACAGTAAGCGGCCAAGCGAAA<br/> GCATTAAGTATTCCACCTGGGGAGTACGCGGCAACGGTGAACCTCAAAGGA<br/> ATTGACGGGGCCCGCACAAAGCGGAGGAACATGTGGTTAATTCGATGATAC<br/> GCGAGGAACCTTACCCGGGCTTAAATGCATTTGAATATATTGGAAACAGTAT<br/> AGCCGTAAGGCAAAATGTGAAGGTGCTGCATGGTTGTCTGTCAGCTCGTGCCGTG<br/> AGGTGTCGGCTTAGGTGCCATAACGAGCGCAGCCCTTATCTTTAGTTACTAAC<br/> AGGTCTATGCTGAGGACTCTAGAGAGACTGCCGTCGTAAGATGTGAGGAAGGT<br/> GGGGATGACGTCAAATCAGCACGGCCCTTACGTCCGGGGCTACACACGTGTTA<br/> CAATGGGGGTACAGAAGGCAGCTACCTGGTGACAGGATGCTAATCCCAAAA<br/> GCCTCTCTCAGTTCGGATCGAAGTCTGCAACCCGACTTCGTGAAGCTGGATT<br/> GCTACTAATCCGGATACGCATGCGCGGTAATACCTTCGGCGGCTTCG</p> |
| 583656  | <i>g__Bacteroides</i>  | <i>Bacteroides nordii</i>    | 98.9  | <p>AGAGTTTGATCATGGCTCAGGATGAACGCTGGCGGCGTGCCCTAATACATGCAA<br/> GTCGAGCGAACAGACGAGGAGCTTGCTCCTTTGACGTTAGCGGCGGACGGGT<br/> GAGTAACACGTGGATAACCTACCTATAAGACTGGGATAAATTCGGGAAACCG<br/> GAGCTAATACCGGATAACATGTTGAACCGCATGGTTCAACAGTGAAAGACGG<br/> TCTTGTCTCACTTATAGATGGATCCGCGCCGATTAGCTAGTTGGTGAGGTA<br/> ACGGCTCACCAAGGCCACGATGCATAGCCGACCTGAGAGGGTGATCGGCCAC<br/> ACTGGGACTGAGACACGGCCAGACTCCTACGGGAGGCACGATAGGGAATC<br/> TTCGGCAATGGACGAAAGTCTGACCGAGCAACGCCGCGTGAGTGAAGAAGGT<br/> TTTCGGATCGTAAAACCTCTGTTGTTAGAGAAGAACAAGGACGTTAGTAACTGA<br/> ACGTCCCCTGACGGTATCTAACCAGAAAGCCACGGCTAACTACGTGCCAGCA<br/> GCCGCGTAATACGTAGGTGGCAAGCGTTGTCCGATTATTGGGCGTAAAGA<br/> GAGCGCAGGCGGTTTCTTAAGTCTGATGTGAAAGCCCCCGGCTCAACCGGGG<br/> AGGGTCATTGAAAACCTGGGAGACTTGAGTGCAGAAGAGGAGAGTGGAAATCC<br/> ATGTGTAGCGGTGAAAATGCGTAGATATATGGAGGAACACCAGTGGCGAAGGC<br/> GGCTCTCTGGTCTGTAACCTGACGCTGAGGCTCGAAAGCGTGGGGAGCAAACA<br/> GGATTAGATACCCTGGTAGTCCACGCCGTAACGATGAGTGTAAAGTGTGGAA<br/> GGGTTCCGCCCTTCAGTGTGACGAAACGCATTAAGCACTCCGCTGGGGGA<br/> GTACGACCGCAAGGTTGAACTCAAAGGAATTGACGGGGGCCCGACAAGCG<br/> GTGGAGCATGTGGTTAATTCGAAGCAACGGAAGAACCTTAAGTGTGGAACTGA<br/> CATCCTTTGACCACTCTAGAGATAGAGCTTCCCTTCGGGGACAAAAGTGACAG<br/> GTGGTGCATGGTTGTCTGTCAGCTCGTGTCTGAGATGTTGGGTTAAGTCCCGC<br/> AACGAGCGCAACCCCTATTGTTAGTTGCCATCATTTAGTTGGGCACTCTAGCG<br/> AGACTGCCGGTGACAAACCGGAGGAAGTGGGGATGACGTCAAATCATCATG<br/> CCCCATTAGACCTGGGCTACACACGTGTACAATGGGAAGTACAACAGCTCGC<br/> TAGACCGGAGGTCATGCAAATCTCTTAAAGCTTCTCTCAGTTCGGATTGCAG<br/> GCTGCAACTCGCCTGCATGAAGCCGGAATCGTAGTAATCGCGGATCAGCAC<br/> GCCGCGGTGAATACGTTCCCG<br/> CTGGCTCAGGATGAACGCTAGCTACAGGCTTAACACATGCAAGTCGAGGGGC<br/> ATCAGGATGTAGCAATACATTGCTGCGACCGGCGCACGGGTGAGTAACACGT<br/> ATCCAACCTGCCTTTACTCGGGGATAGGCTTTTCGAAAGAAAGATTAAATACC<br/> GATGGTATAATATTTCCGCATGGGATTATTATTAAGAATTTCCGGTAAAAGGT<br/> GGGGATGCGTTCCATTAGGCAGTTGGCGGGTAACGGCCCAACCAACCTTCG<br/> ATGGATAGGGGTTCTGAGAGGAAGGTCCCCACATTGGAAGTGAACACGGT<br/> CCAAACTCCTACGGGAGGCAGCAGTGAGGAATATTGGTCAATGGGCGAAAGC<br/> CTGAACCAGCCAAGTAGCGTGAAGGATGACTGCCCTATGGGTTGTAACCTTCT<br/> TTTATAGGGGAATAAAAATGAGCCACGTGTGGCTTTTGTATGTACCCTATGAA<br/> TAAGGATCGGCTAACTCCGTGCCAGCAGCCGCGTAATACGGAGGATCCGAG<br/> CGTTATCCGGATTTATTGGGTTTAAAGGGAGCGTAGGTGGACATGTAAGTCAG<br/> TTGTGAAAAGTTTGGCGCTAACCGTAAAATTGCAGTTGATACTGTGTGTCTTG<br/> AGTACAGTAGAGGTGGGCGAATTCGTGGTGTAGCGGTGAAATGCTTAGATA<br/> TCACGAAGAACTCCGATTGCGAAGGCAGCTCACTGGACTGCAACTGACACTG<br/> ATGCTCGAAAGTGTGGGTATCAAACAGGATTAGATACCTGGTAGTCCACACA<br/> GTAACGATGAATACTCGTGTGTTGCGATATACAGTAAGCGGCCAAGCGAAA<br/> GCATTAAGTATTCCACCTGGGGAGTACGCGGCAACGGTGAACCTCAAAGGA<br/> ATTGACGGGGCCCGCACAAAGCGGAGGAACATGTGGTTAATTCGATGATAC<br/> GCGAGGAACCTTACCCGGGCTTAAATGCATTTGAATATATTGGAAACAGTAT<br/> AGCCGTAAGGCAAAATGTGAAGGTGCTGCATGGTTGTCTGTCAGCTCGTGCCGTG<br/> AGGTGTCGGCTTAGGTGCCATAACGAGCGCAGCCCTTATCTTTAGTTACTAAC<br/> AGGTCTATGCTGAGGACTCTAGAGAGACTGCCGTCGTAAGATGTGAGGAAGGT<br/> GGGGATGACGTCAAATCAGCACGGCCCTTACGTCCGGGGCTACACACGTGTTA<br/> CAATGGGGGTACAGAAGGCAGCTACCTGGTGACAGGATGCTAATCCCAAAA<br/> GCCTCTCTCAGTTCGGATCGAAGTCTGCAACCCGACTTCGTGAAGCTGGATT<br/> GCTACTAATCCGGATACGCATGCGCGGTAATACCTTCGGCGGCTTCG</p> |

|        |                              |                                     |       |                                                                                                                                                                                                                                                                                                                                                                                                                                                                                                                                                                                                                                                                                                                                                                                                                                                                                                                                                                                                                                                                                                                                                                                                                                                                                                                                                                                                                                                                                                                                                                                                                                                                                                                                                                                                                                                                                                                                                                                                                                                                                                                                                                                                                                                                                                                                                                                                                                                                                                                                                                                                                                                                                                                                                                                                                                                                                                                                                                                                                                                                                                                                                                                                                                                                                         |
|--------|------------------------------|-------------------------------------|-------|-----------------------------------------------------------------------------------------------------------------------------------------------------------------------------------------------------------------------------------------------------------------------------------------------------------------------------------------------------------------------------------------------------------------------------------------------------------------------------------------------------------------------------------------------------------------------------------------------------------------------------------------------------------------------------------------------------------------------------------------------------------------------------------------------------------------------------------------------------------------------------------------------------------------------------------------------------------------------------------------------------------------------------------------------------------------------------------------------------------------------------------------------------------------------------------------------------------------------------------------------------------------------------------------------------------------------------------------------------------------------------------------------------------------------------------------------------------------------------------------------------------------------------------------------------------------------------------------------------------------------------------------------------------------------------------------------------------------------------------------------------------------------------------------------------------------------------------------------------------------------------------------------------------------------------------------------------------------------------------------------------------------------------------------------------------------------------------------------------------------------------------------------------------------------------------------------------------------------------------------------------------------------------------------------------------------------------------------------------------------------------------------------------------------------------------------------------------------------------------------------------------------------------------------------------------------------------------------------------------------------------------------------------------------------------------------------------------------------------------------------------------------------------------------------------------------------------------------------------------------------------------------------------------------------------------------------------------------------------------------------------------------------------------------------------------------------------------------------------------------------------------------------------------------------------------------------------------------------------------------------------------------------------------------|
| 252727 | <i>g__Peptostreptococcus</i> | <i>Peptostreptococcus russellii</i> | 96.35 | <p>GATGAACGCTGGCGGCGTGCTTAACACATGCAAGTCGAGCGCGGTCCCTTTGG<br/> TGCTTGACCCAGAGAAGACTGAGCGGCGGACGGGTGAGTAACCGGTGGGTAA<br/> CCTGCCCTATACACATGGATAACATGCTGAAAAGCATACTAATACATGATAAC<br/> GTACTGATGGCATCTTCGGTGTATCAAAGCGTTAGCGGTATAGGATGGACC<br/> CGCGTCTGATTAGCTAGTTGGTGGGGTAAAAGCCTACCAAGGCCACGATCAGT<br/> AGCCGACCTGAGAGGGTATCGGCCACATTGGAAGTGAACACCGTCCAAAC<br/> TCCTACGGGAGGCAGCAGTGGGAATATTGCACAATGGGCGAAAAGCCTGATG<br/> CAGCAACGCCCGTGAACGATGAAGGTCTTCGGATCGTAAAGTTCTGTGCGAG<br/> GGGAAGATAATGACCGTACCCTGTGAGGAAGCACCGGTAACACTACGTGCCAG<br/> CAGCCCGGTAATACGTAGGGTGTAGCGTTATCCGGATTTACTGGGCGTAAA<br/> GGGTGCGTAGGTGCTTTCAAGTCGGTGGTAAAAGGCTACGGCTCAACCGTA<br/> TTAAGCCCGGAAACTGGAAGACTTGAGTGCAGGAGAGGAAAAGTGAATTCT<br/> CAGTGTAGCGGTGAAATGCGTAGATATTGAGAAGAACCAGTAGCGAAGGC<br/> GGCTTTCTGGACTGTAAGTACTGAGGACGAAAAGCGTGGGTAGCAAACA<br/> GGATTAGATATCCTGGTAGTCCACGCCGTAACGATGAGTATTAGGTGTCGGG<br/> GGTTACCCCTCGGTGCCGAGTTAACGCATTAATACTCCGCTGGGGAGT<br/> ACGCACGCAAGTGTGAAACTCAAAGGAATTGACGGGACCCGCACAAGTAGC<br/> GGAGCATGTGGTTAATTCGAAGCAACGCGAAGAACCCTTACCTAAGCTTGACA<br/> TCTCTCAGATCGGTAGTTAATCCTACCTTCCCTTCGGGGTACGATGACAGT<br/> GGTGCATGGTTGTGCTCAGCTCGTGTGCTGAGATGTTGGGTTAAGTCCCGCAA<br/> CGAGCGCAACCCTTGTCTTTAGTTGCCAGCATTAAAGTTGGGCACTTAGAGAG<br/> ACTGCCAGGGATAACCTGGAGGAAGGTGGGGATGACGTCAAAATCATATGCC<br/> CCTTATGTCTTGGGCTACACACGTAACAATGGTCGGCAACAGAGGGAAGCA<br/> AAGCCGTGAGGCAGAGCAAACCCAGAAAACCCGATCCAGCTCGGATTGCGAG<br/> GCTGCAACTCGCCTGGATGAAGTCGGAATCGCTAGTAATCGCAGGTCAGCATA<br/> CTGCGGTGAATACGTTCCCGGCCCTGTACACACCGCCGTCACACCACGAAA<br/> GTTGGTAACACCCGAAGCCGGTGGGGTAACCGTAAGGAGCCAGCCGTCTAAG<br/> GTGGGGCCGATGATTGGGGTG</p> <p>AGAGTTTGATCCTGGCTCAGGATGAACGCCGGCGGTGTGCCTAATACATGCAA<br/> GTCGTACGCGTTGGCCCAACTGATTGAAGTGCCTTGACCGGATCTGACGTTGG<br/> TTTACCAACGAGTGGCGGACGGGTGAGTAACACGTAGGTAACTGCCAGAA<br/> GCGGGGGACAACACTTGGAAACAGGTGCTAATACCGCATAACAATTCAAATC<br/> GCATGATTTGAATTTGAAAGATGGTTTCGGCTATCACTTCTGGATGGACCTGC<br/> GGCGCATTAGCTTGTGGTGGGGTAATGGCTACCAAGGCAGTGTGATGCTAGC<br/> CGAGTTGAGAGACTGATCGGCCACAATGGGACTGAGATACGGCCATACTCC<br/> TACGGGAGGCAGCAGTAGGGAATCTCCACAATGGGGCGAAGCCTGATGGAG<br/> CAACACCGCGTGAGTGAAGAAGGTCTTCGGATCGTAAAGCTCTGTTGTTGAAG<br/> AAGAACGTGCATGAGAGTAACTGTTATGCAGTGACGGTATTCAACCAGAAA<br/> GTCACGGCTAACTACGTGCCAGCAGCCGCGTAATACGTAGGTGGCAAGCGT<br/> TATCCGATTTATTGGGCGTAAAGCGAGCGCAGGCGGTTGCTTAGGTCTGATG<br/> TGAAAGCCTTCGGCTTAACCGAAGAAGGGCATCGGAAACCGGGGCACTTGA<br/> TGCAGAAGAGGACAGTGGAACTCCATGTGTAGCGGTGGAATGCGTAGATATA<br/> TGGAAAGAACCAGTGGCGAAGGCGGGTGTCTGGTCTGCAACTGACGCTGAG<br/> GCTCGAAAGCATGGGTAGCGAACAGGATTAGATACCCTGGTAGTCCATGCCG<br/> TAAACGATGAGTGTAGGTGTTGGAGGGTTCCGCCCTTACGTGCCGAGCTA<br/> ACGCATTAAGCACTCCGCCTGGGGAGTACGACCGCAAGGTTGAAACTCAAAG<br/> GAATTGACGGGGGCGCACAAAGCGGTGGAGCATGTGGTTAATTGCAAGCT<br/> ACGCGAAGAACCCTTACCAGGTCTTGACATCTTGCGCTAACCTAAGAGATTAG<br/> CGTTCCTTCGGGGACGCAATGACAGGTGGTGCATGGTCTGCTCAGCTCGTG<br/> TCGTGAGATGTTGGGTTAAGTCCCGCAACGAGCGCAACCCTTGTACTAGTTG<br/> CCAGCATTAGTTGGCACTCTAGTGAAGTGGCGGTGACAAAACCGGAGGAA<br/> GGTGGGGACGACGTGAGATCATATGCCCTTATGACCTGGGTACACACGTC<br/> CTACAATGGACGGTACAACGAGTTGCGAACTCGCGAGAGTAAGCTAATCTCTT<br/> AAAGCCGTTCTAGTTCGGACTGTAGGCTGCAACTCGCCTACACGAAGTCGGA<br/> ATCGCTAGTAATCGCGATCAGCATGCCCGGTTAATACGTTCCCGGCCCTTG<br/> CACACAACGCCGTC</p> |
| 288521 | <i>g__Lactobacillus</i>      | <i>Lactobacillus equigenerosi</i>   | 97.12 | <p>AGAGTTTGATCCTGGCTCAGGATGAACGCCGGCGGTGTGCCTAATACATGCAA<br/> GTCGTACGCGTTGGCCCAACTGATTGAAGTGCCTTGACCGGATCTGACGTTGG<br/> TTTACCAACGAGTGGCGGACGGGTGAGTAACACGTAGGTAACTGCCAGAA<br/> GCGGGGGACAACACTTGGAAACAGGTGCTAATACCGCATAACAATTCAAATC<br/> GCATGATTTGAATTTGAAAGATGGTTTCGGCTATCACTTCTGGATGGACCTGC<br/> GGCGCATTAGCTTGTGGTGGGGTAATGGCTACCAAGGCAGTGTGATGCTAGC<br/> CGAGTTGAGAGACTGATCGGCCACAATGGGACTGAGATACGGCCATACTCC<br/> TACGGGAGGCAGCAGTAGGGAATCTCCACAATGGGGCGAAGCCTGATGGAG<br/> CAACACCGCGTGAGTGAAGAAGGTCTTCGGATCGTAAAGCTCTGTTGTTGAAG<br/> AAGAACGTGCATGAGAGTAACTGTTATGCAGTGACGGTATTCAACCAGAAA<br/> GTCACGGCTAACTACGTGCCAGCAGCCGCGTAATACGTAGGTGGCAAGCGT<br/> TATCCGATTTATTGGGCGTAAAGCGAGCGCAGGCGGTTGCTTAGGTCTGATG<br/> TGAAAGCCTTCGGCTTAACCGAAGAAGGGCATCGGAAACCGGGGCACTTGA<br/> TGCAGAAGAGGACAGTGGAACTCCATGTGTAGCGGTGGAATGCGTAGATATA<br/> TGGAAAGAACCAGTGGCGAAGGCGGGTGTCTGGTCTGCAACTGACGCTGAG<br/> GCTCGAAAGCATGGGTAGCGAACAGGATTAGATACCCTGGTAGTCCATGCCG<br/> TAAACGATGAGTGTAGGTGTTGGAGGGTTCCGCCCTTACGTGCCGAGCTA<br/> ACGCATTAAGCACTCCGCCTGGGGAGTACGACCGCAAGGTTGAAACTCAAAG<br/> GAATTGACGGGGGCGCACAAAGCGGTGGAGCATGTGGTTAATTGCAAGCT<br/> ACGCGAAGAACCCTTACCAGGTCTTGACATCTTGCGCTAACCTAAGAGATTAG<br/> CGTTCCTTCGGGGACGCAATGACAGGTGGTGCATGGTCTGCTCAGCTCGTG<br/> TCGTGAGATGTTGGGTTAAGTCCCGCAACGAGCGCAACCCTTGTACTAGTTG<br/> CCAGCATTAGTTGGCACTCTAGTGAAGTGGCGGTGACAAAACCGGAGGAA<br/> GGTGGGGACGACGTGAGATCATATGCCCTTATGACCTGGGTACACACGTC<br/> CTACAATGGACGGTACAACGAGTTGCGAACTCGCGAGAGTAAGCTAATCTCTT<br/> AAAGCCGTTCTAGTTCGGACTGTAGGCTGCAACTCGCCTACACGAAGTCGGA<br/> ATCGCTAGTAATCGCGATCAGCATGCCCGGTTAATACGTTCCCGGCCCTTG<br/> CACACAACGCCGTC</p>                                                                                                                                                                                                                                                                                                                                                                                                                                                                                                                                                                                                                                                                                                                                                                                                                                                                                                                                                                                                                                                                                                                                                                                                                                                                                                                                                                                                                                                                                                                                                                                                                                                 |

|         |                         |                                 |       |                                                                                                                                                                                                                                                                                                                                                                                                                                                                                                                                                                                                                                                                                                                                                                                                                                                                                                                                                                                                                                                                                                                                                                                                                                                                                                                                                                                                                                                                                                                                                                                                                                                                                                                                                                                                                                                                                                                                                                                                                                                                                                                                                                                                                                                                                                                                                                                                                                                                                                                                                                                                                                                                                                                                                                                                                                                                                                                                                                                                                                                                                                                                                                       |
|---------|-------------------------|---------------------------------|-------|-----------------------------------------------------------------------------------------------------------------------------------------------------------------------------------------------------------------------------------------------------------------------------------------------------------------------------------------------------------------------------------------------------------------------------------------------------------------------------------------------------------------------------------------------------------------------------------------------------------------------------------------------------------------------------------------------------------------------------------------------------------------------------------------------------------------------------------------------------------------------------------------------------------------------------------------------------------------------------------------------------------------------------------------------------------------------------------------------------------------------------------------------------------------------------------------------------------------------------------------------------------------------------------------------------------------------------------------------------------------------------------------------------------------------------------------------------------------------------------------------------------------------------------------------------------------------------------------------------------------------------------------------------------------------------------------------------------------------------------------------------------------------------------------------------------------------------------------------------------------------------------------------------------------------------------------------------------------------------------------------------------------------------------------------------------------------------------------------------------------------------------------------------------------------------------------------------------------------------------------------------------------------------------------------------------------------------------------------------------------------------------------------------------------------------------------------------------------------------------------------------------------------------------------------------------------------------------------------------------------------------------------------------------------------------------------------------------------------------------------------------------------------------------------------------------------------------------------------------------------------------------------------------------------------------------------------------------------------------------------------------------------------------------------------------------------------------------------------------------------------------------------------------------------------|
| 589277  | <i>g__Bacteroides</i>   | <i>Bacteroides dorei</i>        | 98.83 | <p>GATGAACGCTAGCTACAGGCTTAACACATGCAAGTCGAGGGGCAGCATGGTC<br/> TTAGCTTGCTAAGGCTGATGGCGACCGGCGCACGGGTGAGTAACACGTATCCA<br/> ACCTGCCGTCTACTCTTGGCCAGCCTTCTGAAAAGGAAGATTAATCCAGGATGG<br/> GATCATGAGTTCACATGTCCGCATGATTAAGGTATTTCCGGTACACGATGG<br/> GGATGCGTCCCATTTAGATAGTAGGCGGGGTAACGGCCACCTAGTCAACGAT<br/> GGATAGGGGTTCTGAGAGGAAGGTCCCCACATTGGAAGTCTGAGACACGGTCC<br/> AAACTCCTACGGGAGGCAGCAGTGAGGAATATTGGTCAATGGGGCATGGCCT<br/> GAACCAGCCAAGTAGCGTGAAGGATGACTGCCCTATGGGTCGTAACCTCTTT<br/> TATAAAGGAATAAAGTCCGGGTATGCATACCCGTTTGCATGACTTTATGAATA<br/> AGGATCGGCTAACTCCGTGCCAGCAGCCGCGTAATACGGAGGATCCGAGCG<br/> TTATCCGGATTTATTGGGTTTAAAGGGAGCGTAGATGGATGTTAAAGTCAGTT<br/> GTGAAAGTTTGGCGCTCAACCGTAAAATTGCAGTTGATACTGGATGCTTGGAG<br/> TGCAGTTGAGGCAGGCGGAATTCGTGGTGTAGCGGTGAAATGCTTAGATATCA<br/> CGAAGAAGTCCGATTGCGAAGGCAGCCTGCTAAGCTGCAACTGACATTGAGG<br/> CTCGAAAAGTGTGGGTATCAAACAGGATTAGATACCCGTGGTAGTCCACACGGTA<br/> AACGATGAATACTCGTGTTTGCGATATACGGCAAGCGGCCAAGCGAAAGCG<br/> TTAAGTATTCCACCTGGGAGTACGCCGGCAACGGTGAAGTCAAAGGAATA<br/> GACGGGGGCCCCGACAAGCGGAGGAACATGTGGTTAATTTCGATGATACGGC<br/> AGGAACCTTCCGGGCGTAAATTGCACTCGAATGATCCGAAACGGTTACG<br/> CTAGCAATAGCGAGTGTGAAGGTGGTGCATGGTTGTCGTCAGCTCGTCCGCTG<br/> AGGTGTCGGCTTAAGTGCATAACGAGCGCAACCCTCGTTGTCAGTTACTAAC<br/> AGGTGATGCTGAGGACTCTGACAAGACTGCCATCGTAAGATGTGAGGAAGGT<br/> GGGAGGACGTCAAATCAGCACGGCCCTACGTCCGGGGGTACACACGTGTT<br/> ACAATGGGGGGGACAGAGGGCCGCTACCACGCGAGTGGATGCCAATCCCTAA<br/> AACCCCTCTCAGTTCGGACTGGAGTGTGCAACCCGACTCCACGAAGCTGGATT<br/> CGTAGTAATCGCGCATCAGCCACGGCGCGGTGAAAAAGATCCCGGGCCTTG<br/> TACA</p> <p>GACGAACGCTGGCGCGTGCCTAATACATGCAAGTAGAACGCTGAGGTTTGG<br/> TGTTTACACTAGACTGATGAGTTGCGAACGGGTGAGTAACCGGTAGGTAACCT<br/> GCCTCATAGCGGGGATAACTATTGGAAACGATAGCTAATACCGCATAAGAG<br/> TAATTAACACATGTTGGTTATTTAAAAGGAGCAATTGCTTCACTGTGAGATGG<br/> ACCTGCGTGTATTAGCTAGTTGGTGTAGGTAAGGCTCACCAAGGCGACGATA<br/> CATAGCCGACCTGAGAGGGTGTATCGGCCACACTGGGACTGAGACACGGCCCA<br/> GACTCCTACGGGAGGCAGCAGTAGGGAATCTTCGGCAATGGACGGAAGTCTG<br/> ACCGAGCAACGCCCGTGTGAGTGAAGAAGGTTTTTCGGATCGTAAAGCTCTGTTG<br/> TTAGAGAAGAACGTTGGTAGGAGTGGAAAATCTACCAAGTGACGGTAACTAA<br/> CCAGAAAGGGACGGCTAACTACGTGCCAGCAGCCGCGTAATACGTAGGTCC<br/> CGAGCGTTGTCCGATTTATTGGGCGTAAAGCGAGCGCAGGCGGTTCTTTAAG<br/> TCTGAAGTTAAAGGCAGTGGCTTAAACATTGTACGCTTTGGAAAAGTGGAGGAC<br/> TTGAGTGCAGAAGGGGAGAGTGGAAATCCATGTGTAGCGGTGAAATGCGTAG<br/> ATATATGGAGAAACACCGGTGGCGAAAGCGGCTCTCTGGTCTGTAAGTACG<br/> CTGAGGCTCGAAAGCGTGGGGAGCAAACAGGATTAGATACCCCTGGTAGTCCA<br/> CGCCGTAACGATGAGTGTAGGTGTTAGGCCCTTTCCGGGGCTTAGTGCCTG<br/> AGCTAACGCATTAAGCACTCCGCCTGGGGAGTACGACCGCAAGGTTGAAACT<br/> CAAAGGAATTGACGGGGGCCGACAAAGCGGTGGAGCATGTGGTTAATTTCG<br/> AAGCAACGCGAAGAACCTTACCAGGTCTTGACATCCTTCTGACCGGCTAGAG<br/> ATAGGCTTCTCTTCGGAGCAGAAGTGACAGGTGGTGCATGGTTGTCGTGAG<br/> TTGTGTCGTGAGATGTTGGGTTAAGTCCCGCAACGAGCGCAACCCCTATTGTT<br/> AGTTGCCATCATTAAAGTTGGGCACTCTAGCGAGACTGCCGGTAATAAACCGGA<br/> GGAAGGTGGGGATGACGTCAAATCATCATGCCCTTATGACCTGGGCTACACA<br/> CGTGCTACAATGGACAATAACAAGGGCAGCGAAACCGGAGGTCAAGCAAAT<br/> CCCATAAAGTTGTTCTCAGTTCGGATTGTAGTCTGCAACTCGACTACATGAAG<br/> CTGGAATCGCTAGTAATCGTAGATCAGCATGCTACGGTGAATACGTTCCCGG<br/> TCT</p> |
| 1076969 | <i>g__Streptococcus</i> | <i>Streptococcus agalactiae</i> | 97.59 |                                                                                                                                                                                                                                                                                                                                                                                                                                                                                                                                                                                                                                                                                                                                                                                                                                                                                                                                                                                                                                                                                                                                                                                                                                                                                                                                                                                                                                                                                                                                                                                                                                                                                                                                                                                                                                                                                                                                                                                                                                                                                                                                                                                                                                                                                                                                                                                                                                                                                                                                                                                                                                                                                                                                                                                                                                                                                                                                                                                                                                                                                                                                                                       |

537290      *g\_Morganella*      *Morganella morganii*      98.08

TAGAGTTTGATCCTGGCTCAGATTGAACGCTGGCGGCAGGCCTAACACATGCA  
AGTCGGGCGGTAACAGGGAGAAGCTTGCTTCTCTGCTGACGAGCGGCGGACG  
GGTGAGTAATGTATGGGGATCTGCGTGATGGAGGGGGGATAACTCTGGAAAC  
GGTAGCTAATACCGCATAATGTCTTCGGACCAAAGCGGGGACCTCCGGGCCT  
CGCGCCATCAGATGAACCCATATGGGATTAGCTTGTAGGTGAGGTAACGGCTC  
ACCTAGGCGACGATCCCTAGCTGGTCTGAGAGGATGATCAGCCACACTGGGA  
CTGAGACACGGCCAGACTCCTACGGGAGGCAGCAGTGGGGAATATTGCACA  
ATGGGCGCAAGCCTGATGCAGCCATGCCCGTGTATGAAGAAGCCTTCGGG  
TTGTAAGTACTTTTCAGTCGGGAGGAAGGTGTTAAGGTTAATAACCTTAGCAA  
TTGACGTTACCGACAGAAGAAGCACCAGGCTAACTCCGTGCCAGCAGCCGGG  
TAATACGGAGGGTGAAGCGTTAATCGGAATTACTGGGCGTAAAGCGCACGC  
AGGCGGTTGATTGAGTCAGATGTGAAATCCCGGGCTTAACCCGGGAATTGCA  
TCTGATACTGGTCAGCTAGAGTCTTGTAGAGGGGGGTAGAATTCCATGTGTAG  
CGGTGAAATGCGTAGAGATCTGGAGGAATACCGGTGGCGAAGGCGGCCCCCT  
GGACAAAGACTGACGCTCAGGTGCGAAAAGCGTGGGGAGCAACAGGATTAG  
ATACCCTGGTAGTCCACGCCGTAACGATGTCGACTTGGAGGTTGTGCCCTTG  
AGGCGTGGCTCCGGAGCTAACGCGTTAAGTCGACCCGCTGGGGAGTACGGC  
CGCAAGGTTAAAACCTCAAATGAATTGACGGGGGCCGCACAAGCGGTGGAGC  
ATGTGGTTAATTTCGATGCAACGCGAAGAACCTTACTACTCTTGCATCCAG  
AGAACTTAGCAGAGATGCTTTGGTGCCTTCGGGAACCTGAGACAGGTGCTGC  
ATGGCTGTCTGACGCTCGTGTGTTGAAATGTTGGGTTAAGTCCCGCAACGAGC  
GCAACCCTTATCCTTTGTTGCCAGCGGTTCCGGCCGGAACCTCAAAGGAGACTG  
CCAGTGATAAACTGGAGGAAGGTGGGGATGACGTCAAGTCATCATGGCCCTT  
ACGAGTAGGGCTACACAGTGCTACAATGGCATATACAAAAGAGAAGCGACCT  
CGCGAGAGCAAGCGGACCTCATAAAGTATGTCGTAGTCCGGTAGGATCG  
CAACTCGACTCCATGAAGTCGGAATCGCTAGTAATCGTGGATCAGAATGCCAC  
GGTGAATACGTTCCCGGCCTTGACTCACCGCCGTC

572889      *g\_Fusobacterium*      *Fusobacterium mortiferum*      98.71

GAGTTTGATCCTGGCTCAGGATGAACGCTGACAGAATGCTTAAACATGCAAG  
TCTACTTGATCCTTCGGGTGATGGTGGCGGACGGGTGAGTAACGCGTAAAGAA  
CTTGCCCTGCAGTCTGGGACAACATTTGAAAACGAATGCTAATACCGGATATT  
ATGCGAGATTCGATGTTTCTCGTATGAAAGCTATATCGCTGCCAGAGAGCT  
TTGCGTCTATTAGCTAGTTGGTGAGGTAATGGCTCACCAAGGCGATGATAGG  
TAGCCGGCTGAGAGGGTGAACGGCCACAAGGGGACTGAGACACGGCCCTTA  
CTTCTACGGGAGGCAGCAGTGGGGAATATTGGACAATGGACAAAAGTCTGA  
TCCAGCAATTCTGTGTGCACGATGAAGTTTTTCGGAATGTAAGTGTCTTCAG  
TTGGGACGAAGTAAGTGACGGTACCAACAGAAGAAGCGACGGCTAAATACGT  
GCCAGCAGCCGCGTAATACGTATGTCGCAAGCGTTATCCGGATTTATTGGGC  
GTAAGCGCGTCTAGGCGGTTTGGTAAAGTCTGATGTGAAAATGCGGGGCTCA  
ACTCCGTATTGCGTTGGAACTGTCAAAGTACTGAGTACTGGAGAGGTGGCGG  
AACTACAAGTGTAGAGGTGAAATTCGTAGATATTTGTAGGAATGCCGATGGG  
GAAGCCAGCCACTGGACAGATACTGACGCTAAAGCGGAAAGCGTGGGTAG  
CAAACAGGATTAGATACCCTGGTAGTCCACGCCGTAACAGATGATTACTAGGT  
GTTGGGGTCAACCTCAGCGCCAAAGCTAACCGGATAAGTAATCCGCCTGG  
GGAGTACGTACGCAAGTATGAAACTCAAAGGAATTGACGGGGACCCGCACAA  
GCGGTGGAGCATGTGGTTAATTCGACGCAACGCGAGGAACCTTACCAGCGTT  
TGACATCCTAGGAAGTTGGCAGAGATGCCTTCGTGCCCTTCGGGGGAACCTA  
GTGACAGGTGGTGCATGGCTGTCGTCAGCTCGTGTCTGAGATGTTGGGTTAA  
GTCCCGCAACGAGCGCAACCCTTTCGTATGTTGCCATCATTAAGTTGGGAAC  
TCATGCGATACTGCCTGCGATGAGCAGGAGGAAGGTGGGGATGACGTCAAGT  
CATCATGCCCTTATACGCTGGGCTACACACGTGCTACAATGGGTAGTACAGA  
GAGTCGCTAACCTGCGAGGGGGAGCTAATCTCAGAAAACCTATTCTCAGTTCGG  
ATTGTACTCTGCAACTCGAGTACATGAAGTTGGAATCGCTAGTAATCGCAAAT  
CAGCTATGTTGGGTGAATACGTTCTCGGGTCTTGTACACACCCGCCGTCACA  
CCACGAGAGTTGGTGCACCTGAAGTAGTAGGCCTAACCGCAAGGAGGGATG  
CTCCGAGGGTGTGATTAGCGATTGGGGTGAAGTCGTAACAAGGTAGCCGTAG



|        |                           |                                  |       |                                                                                                                                                                                                                                                                                                                                                                                                                                                                                                                                                                                                                                                                                                                                                                                                                                                                                                                                                                                                                                                                                                                                                                                                                                                                                                                                                                                                                                                                                                                                                                                                                                                                                                                                                                                                                                                                                                                                                                                                                                                                                                                                                                                                                                                                                                                                                                                                                                                                                                                                                                                                                                                                                                                                                                                                                                                                                                                                                                                                                                                                                                                                                                                                                                                                                    |
|--------|---------------------------|----------------------------------|-------|------------------------------------------------------------------------------------------------------------------------------------------------------------------------------------------------------------------------------------------------------------------------------------------------------------------------------------------------------------------------------------------------------------------------------------------------------------------------------------------------------------------------------------------------------------------------------------------------------------------------------------------------------------------------------------------------------------------------------------------------------------------------------------------------------------------------------------------------------------------------------------------------------------------------------------------------------------------------------------------------------------------------------------------------------------------------------------------------------------------------------------------------------------------------------------------------------------------------------------------------------------------------------------------------------------------------------------------------------------------------------------------------------------------------------------------------------------------------------------------------------------------------------------------------------------------------------------------------------------------------------------------------------------------------------------------------------------------------------------------------------------------------------------------------------------------------------------------------------------------------------------------------------------------------------------------------------------------------------------------------------------------------------------------------------------------------------------------------------------------------------------------------------------------------------------------------------------------------------------------------------------------------------------------------------------------------------------------------------------------------------------------------------------------------------------------------------------------------------------------------------------------------------------------------------------------------------------------------------------------------------------------------------------------------------------------------------------------------------------------------------------------------------------------------------------------------------------------------------------------------------------------------------------------------------------------------------------------------------------------------------------------------------------------------------------------------------------------------------------------------------------------------------------------------------------------------------------------------------------------------------------------------------------|
| 851323 | <i>g__Parabacteroides</i> | <i>Parabacteroides johnsonii</i> | 97.55 | <p>CCTGGCTCAGGATGAACGCTAGCGACAGGCTTAACACATGCAAGTCGAGGGG<br/> CAGCACAGGTAGCAATACCGGGTGGCGACCGGCGACGGGTGAGTAACGCGT<br/> ATGCAACTTACCTATCAGAGGGGGATAACCGGCGAAAAGTCGGACTAATACC<br/> GCATGAAGCAGGGGCCCGCATGGGGATATTTGCTAAAGATTCATCGCTGATA<br/> GATAGGCATGCGTTCCATTAGGCAGTTGGCGGGGCAACGGCCCAAAACCG<br/> ACGATGGATAGGGTTCTGAGAGGAAGTCCCCACATTGGTACTGAGACAC<br/> GGACAAAACCTCTACGGGAGGCAGCAGTGAGGAATATTGGTCAATGGGCGTA<br/> AGCCTGAACCAGCCAAGTCGCGTGAAGGATGAAGGATCTATGGTTTGTAAAC<br/> TTCTTTATAGGGGAATAAAGTGTGGGACGTGTCCCATTTTGTATGTACCTAT<br/> GAATAAGCATCGGCTAACTCCGTGCCAGCAGCCGGTAATACGGAGGATGC<br/> GAGCGTTATCCGATTTATTGGGTTTAAAGGGTGCAGTGGTAAATTTAAGT<br/> CAGCGGTGAAAAGTTTGTGGCTCAACCATAAAATTGCCGTTGAAACTGGGTTAC<br/> TTGAGTGTGTTTGGAGTGGCGGAATGCGTGGTGTAGCGGTGAAATGCATAG<br/> ATATCACGCAGAATCCAATTGCGAAGGCAGCTTACTAAACCATAACTGACAC<br/> TGAAGCACGAAAGCGTGGGTATCAAACAGGATTAGATACCTGGTAGTCCAC<br/> GCAGTAAACGATGATTACTAGGAGTTTGGGATACACAGTAAGCTCTACAGCG<br/> AAAGCGTTAAGTAATCCACTGGGGAGTACGCCGGCAACGGTGAACCTAAA<br/> GGAAATTGACGGGGCCCGCACAAGCGGAGGAACATGTGGTTAATTTCGATGA<br/> TACGCGAGGAACCTTACCGGGTTTGAACGTAGTCAGACGAAAGTGAAGCA<br/> GGTCTTCTAGCAATAGCTGATTACGAGGTGCTGCATGGTTGTGTCAGCTCGT<br/> GCCGTGAGATGTGGCCTAAGTGCCATAACGAGCGCAACCTTATCAGTGT<br/> ACTAACAGGTCTGTGCTGAGGACTCTGGTGTAGACTGCCAGCGTAAGCTGTGAG<br/> GAAGGTGGGATGACGTCAAATCAGCACGGCCCTTACATCCGGGGCGACACA<br/> CGTGTACAATGGCATGGACAAAAGGGCAGTACCTGGGCGACAGGATGCTAAT<br/> CTCTAAACCATGTCTCAGTTCGGATCGGAGTCTGCAACTCGACTCCGTGAAGC<br/> TGGATTGCTAGTAATCGCGCATCAGCCATGGCGCGGTGAATACGTTCCCGGG<br/> CCTTGACACACCGCCC</p> <p>TAATACATGCAAGTCGAGCGAGCTGAATTCAAAGATCCCTTCGGGGGGATTTG<br/> TTGGACGCTAGCGGCGGATGGGTGAGTAACACGTGGGCAATCTGCCCTAAAG<br/> ACTGGGATACCCTTGAAACAGGTGCTAATACCGGATAACAACATGAATCG<br/> CATGATTCAAGTTTGAAGGGCGGCAAGCTGTACTTTAGGATGAGCCCGCG<br/> GCGCATTAGCTAGTTGGTGGGGTAAAGGCCTACCAAGCAATGATGCGTAGC<br/> CGAGTTGAGAGACTGATCGGCCACATTGGGACTGAGACACGGCCCAAACTCC<br/> TACGGGAGGCAGCAGTAGGGAATCTTCCACAATGGACGAAAGTCTGATGGAG<br/> CAACGCCGCGTGAAGAAAAGTCTTCGGATCGTAAAGCTCTGTTGTTGGT<br/> AAGAAGGATAGAGGCAGCAACTGGTCTTATTGACGGTAATCAACCAGAAA<br/> GTCACGGTAACTACGTGCCAGCAGCCGCGTAATACGTAGGTGGCAAGCGT<br/> TGTCCGATTTATTGGGCGTAAAGCGAGCGCAGCGGAAAATAAGTCTAAT<br/> GTGAAAAGCCCTCGGCTTAAACGAGGAACTGCATCGGAAACTGTTTTCTTGAG<br/> TGCAGAAGAGGAGAGTGAAGTCCATGTGTAGCGGTGGAATGCGTAGATATA<br/> TGGAAGAACACCAGTGGCGAAGCGGGTCTCTGGTCTGCAACTGACGCTGAG<br/> GCTCGAAAGCATGGGTAGCGAACAGGATTAGATACCCTGGTAGTCCATGCCG<br/> TAAACGATGAGTGCTAAGTGTGGGAGGTTTCCGCTCTCAGTGTGCAAGCTA<br/> ACGCATTAAGCACTCCGCCTGGGAGTACGACCGCAAGGTTGAAACTCAAAG<br/> GAATTGACGGGGGCCCGCACAAAGCGGTGGAGCATGTGGTTAATTTCGAAGCA<br/> ACGCGAAGAACCTTACCAGGTCTTACATCTAGTCAATCTGTAGAGATATGG<br/> AGTTCCTTCGGGGACGCTAAGACAGGTGGTGCATGGCTGTGTCAGCTCGT<br/> TCGTGAGATGTTGGGTTAAGTCCCAGCAACGAGCGCAACCTTGTATTAGTTG<br/> CCAGCATTAAGTTGGGCACTTAATGAGACTGCCGGTGACAAAACCGGAGGAA<br/> GGTGGGATGACGTCAAGTCAATGATGCCCCCTTATGACCTGGGCTACACAGT<br/> CTACAATGGGAGTACAACGAGAAGCAAGCCTGCGAAGGCAAGCAATCTCT<br/> GAAAGCTGTTCTCAGTTCGGACTGCAGTCTGCAACTCGACTGCACGAAGCTGG<br/> AATCGCTAGTAATCGCGGATCAGCACGCCGCGTGAATACGTTCCCGGGCCTT<br/> GTACACACCGCCGTCACACCATGGGAGTCTGCAATGCCCAAAGCCGGTGGC<br/> CTAACCTTCGGGAAGGAGCGTCTAAGGCAGGGCAGATGACTTGGGGGTGAA<br/> GTCGTAACAAGGTAGCCGTAGGAGAACC</p> |
| 703741 | <i>g__Lactobacillus</i>   | <i>Lactobacillus acidophilus</i> | 96.41 | <p>TAATACATGCAAGTCGAGCGAGCTGAATTCAAAGATCCCTTCGGGGGGATTTG<br/> TTGGACGCTAGCGGCGGATGGGTGAGTAACACGTGGGCAATCTGCCCTAAAG<br/> ACTGGGATACCCTTGAAACAGGTGCTAATACCGGATAACAACATGAATCG<br/> CATGATTCAAGTTTGAAGGGCGGCAAGCTGTACTTTAGGATGAGCCCGCG<br/> GCGCATTAGCTAGTTGGTGGGGTAAAGGCCTACCAAGCAATGATGCGTAGC<br/> CGAGTTGAGAGACTGATCGGCCACATTGGGACTGAGACACGGCCCAAACTCC<br/> TACGGGAGGCAGCAGTAGGGAATCTTCCACAATGGACGAAAGTCTGATGGAG<br/> CAACGCCGCGTGAAGAAAAGTCTTCGGATCGTAAAGCTCTGTTGTTGGT<br/> AAGAAGGATAGAGGCAGCAACTGGTCTTATTGACGGTAATCAACCAGAAA<br/> GTCACGGTAACTACGTGCCAGCAGCCGCGTAATACGTAGGTGGCAAGCGT<br/> TGTCCGATTTATTGGGCGTAAAGCGAGCGCAGCGGAAAATAAGTCTAAT<br/> GTGAAAAGCCCTCGGCTTAAACGAGGAACTGCATCGGAAACTGTTTTCTTGAG<br/> TGCAGAAGAGGAGAGTGAAGTCCATGTGTAGCGGTGGAATGCGTAGATATA<br/> TGGAAGAACACCAGTGGCGAAGCGGGTCTCTGGTCTGCAACTGACGCTGAG<br/> GCTCGAAAGCATGGGTAGCGAACAGGATTAGATACCCTGGTAGTCCATGCCG<br/> TAAACGATGAGTGCTAAGTGTGGGAGGTTTCCGCTCTCAGTGTGCAAGCTA<br/> ACGCATTAAGCACTCCGCCTGGGAGTACGACCGCAAGGTTGAAACTCAAAG<br/> GAATTGACGGGGGCCCGCACAAAGCGGTGGAGCATGTGGTTAATTTCGAAGCA<br/> ACGCGAAGAACCTTACCAGGTCTTACATCTAGTCAATCTGTAGAGATATGG<br/> AGTTCCTTCGGGGACGCTAAGACAGGTGGTGCATGGCTGTGTCAGCTCGT<br/> TCGTGAGATGTTGGGTTAAGTCCCAGCAACGAGCGCAACCTTGTATTAGTTG<br/> CCAGCATTAAGTTGGGCACTTAATGAGACTGCCGGTGACAAAACCGGAGGAA<br/> GGTGGGATGACGTCAAGTCAATGATGCCCCCTTATGACCTGGGCTACACAGT<br/> CTACAATGGGAGTACAACGAGAAGCAAGCCTGCGAAGGCAAGCAATCTCT<br/> GAAAGCTGTTCTCAGTTCGGACTGCAGTCTGCAACTCGACTGCACGAAGCTGG<br/> AATCGCTAGTAATCGCGGATCAGCACGCCGCGTGAATACGTTCCCGGGCCTT<br/> GTACACACCGCCGTCACACCATGGGAGTCTGCAATGCCCAAAGCCGGTGGC<br/> CTAACCTTCGGGAAGGAGCGTCTAAGGCAGGGCAGATGACTTGGGGGTGAA<br/> GTCGTAACAAGGTAGCCGTAGGAGAACC</p>                                                                                                                                                                                                                                                                                                                                                                                                                                                                                                                                                                                                                                                                                                                                                                                                                                                                                                                                                                                                                                                                                                                                                                                                                                                                                                                                                                                                                                                                                                                                                                              |

|        |                        |                                  |     |                                                                                                                                                                                                                                                                                                                                                                                                                                                                                                                                                                                                                                                                                                                                                                                                                                                                                                                                                                                                                                                                                                                                                                                                                                                                                                                                                                                                                                                                                                                                                                                                                                                                                                                                                                                                                                                                                                                                                                                                                                                                                                                                                                                                                                                                                                                                                                                                                                                                                                                                                                                                                                                                                                                                                                                                                                                                                                                                                                                                                                                                                                                                                                                                                                               |
|--------|------------------------|----------------------------------|-----|-----------------------------------------------------------------------------------------------------------------------------------------------------------------------------------------------------------------------------------------------------------------------------------------------------------------------------------------------------------------------------------------------------------------------------------------------------------------------------------------------------------------------------------------------------------------------------------------------------------------------------------------------------------------------------------------------------------------------------------------------------------------------------------------------------------------------------------------------------------------------------------------------------------------------------------------------------------------------------------------------------------------------------------------------------------------------------------------------------------------------------------------------------------------------------------------------------------------------------------------------------------------------------------------------------------------------------------------------------------------------------------------------------------------------------------------------------------------------------------------------------------------------------------------------------------------------------------------------------------------------------------------------------------------------------------------------------------------------------------------------------------------------------------------------------------------------------------------------------------------------------------------------------------------------------------------------------------------------------------------------------------------------------------------------------------------------------------------------------------------------------------------------------------------------------------------------------------------------------------------------------------------------------------------------------------------------------------------------------------------------------------------------------------------------------------------------------------------------------------------------------------------------------------------------------------------------------------------------------------------------------------------------------------------------------------------------------------------------------------------------------------------------------------------------------------------------------------------------------------------------------------------------------------------------------------------------------------------------------------------------------------------------------------------------------------------------------------------------------------------------------------------------------------------------------------------------------------------------------------------------|
| 604966 | <i>g_Lactobacillus</i> | <i>Lactobacillus diolivorans</i> | 100 | <p>GACGAGTGGCGAACTGGTGAGTAACACGTGGGTAACCTGCCCTTGAAGTAGA<br/> GGATAACACTTGGAAACAGGTGCTAATACTGCATAACAACGAAAACCGCCTG<br/> GTTTTGTTTTGAAAGATGGCTTCGGCTATCGCTTTAGGATGGACCCGCGGCGT<br/> ATTAGCTAGTTGGTGAGGTAACGGCTCACCAAGGCAATGATACGTAGCCGAC<br/> CTGAGAGGGTAATCGGCCACATTGGGACTGAGACACGGCCAACTCCTACG<br/> GGAGGCAGCAGTAGGGAATCTTCCACAATGGACGAAAGTCTGATGGAGCAAC<br/> GCCGCGTGAGTGATGAAGGGTTTCGGCTCGTAAAACCTCTGTTGTTGGAGAAGA<br/> ACGGGTGTCAGAGTAACCTGTTGACATCGTGACGGTATCCAACCAGAAAGCCA<br/> CGGCTAACTACGTGCCAGCAGCCGCGTAATACGTAGGTGGCAAGCGTTGTCC<br/> GGATTTATTGGGCGTAAAGCGAGCGCAGGCGGTTTTTTAGGTCTGATGTGAAA<br/> GCCTTCGGCTTAACCGGAGAAGTGATCGGAAACCGGGAGACTTGAGTGCAG<br/> AAGAGGACAGTGGAATCCATGTGTAGCGGTGAAATGCGTAGATATATGGAA<br/> GAACACCAGTGGCGAAGGCGGCTGTCTGGTCTGCAACTGACGCTGAGGCTCG<br/> AAAGCATGGGTAGCGAACAGGATTAGATACCCTGGTAGTCCATGCCGTA AAC<br/> GATGAGTGTCTAAGTGTGGAGGGTTTCGGCCCTTCACTGCTGCAGCTAACGCA<br/> TTAAGCACTCCGCTGGGGAGTACGACCGCAAGGTTGAAAACCAAAGGAATT<br/> GACGGGGGCCCGCACAAAGCGGTGGAGCATGTGGTTAATTTCGATGCTACGCG<br/> AAGAACCTTACCAGGTCTTGACATCTTCTGCCAACCTAAGAGATTAGGCGTTC<br/> CCTTCGGGACAGAAATGACAGGTGGTGCATGGTTGTGCTGAGCTGAGTGCAG<br/> AGATGTTGGGTTAAGTCCCGCAACGAGCGCAACCCCTTATTGTTAGTTGCCAGC<br/> ATTTAGTTGGGACTCTAGCAAGACTGCCGGTGACAAAACCGGAGGAAGGTGG<br/> GGATGACGTCAAATCATCATGCCCCCTTAGACCTGGGCTACACACGTGCTACA<br/> ATGGACGGTACAACGAGTCGCGAAACCGCGAGGTCAAGCTAATCTCTTAAAG<br/> CCGTTCTCAGTTCGGATTGTAGGCTGCAACTCGCCTACATGAAGTTGGAATCG<br/> CTAGTAATCGTGGATCAGCATGCCACGGTGAATACGTTCCCGGGCCTTGTACA<br/> CACCGCCCGTACACCATGAGAGTTGTAAACCCAAAGCCGGTGAGGTAAC<br/> CTTCGGGGGCCAGCCGTCTAAGGTGGGACAGATGATTAGGTTGAAGTCGTAA<br/> CAAGGTAGCCGTAGGAGAACCTGCGGCTGGATCACCTCCT</p> <p>ATGGGAGCTTGCTCCTATCATCTTAGTGGCGAACGGGTGAGTAACCGTAATC<br/> ACCTGCCCTTCAATGGGGGACAACAGTTGGAACGACTGCTAATACCGCATA<br/> GTCGGCATCGAGAAAGGTGGCCTTTTTAAAGCTATCGTTGAAGGAGGGGATTG<br/> CGTCTGATTAGCTAGTTGGAGGGGTAACGGCCCAACCAAGGCAATGATCAGTA<br/> GCCGGTCTGAGAGGATGAACGGCCACATTGGGACTGAGACACGGCCAACT<br/> CCTACGGGAGGCAGCAGTGGGAATCTTCCGCAATGGACGAAAGTCTGACCG<br/> AGCAACGCCGCGTGAGTGATGAAGGTCTTCGGATTGTAAGGCTCTGTTAATCG<br/> GGACGAAGAGCCTAGTGTGAATAATGCTAGGAAGTGACGGTACCGGAATAGA<br/> AAGCCACGGCTAACTACGTGCCAGCAGCCGCGTAATACGTAGGTGGCAAGC<br/> GTTGTCCGGAATTATTGGGCGTAAAGCGCGCGCAGGCGGATCTGCCAGTCTGT<br/> CTTAAAAGTTCGGGGCTTAACCCCGTGATGGGATGGAACTACAGATCTAGA<br/> GTATCGGAGAGGAAAAGTGAATTCCTAGTGTAGCGGTGAAATGCGTAGATAT<br/> TAGGAAGAACACCAGTGGCGAAGGCGACTTTCTGGACGAAAACGACGCTGA<br/> GGCGCGAAAGCCAGGGGAGCGAACGGGATTAGATACCCCGGTAGTCTGGCC<br/> GTAAACGATGGGTACTAGGTGTAGGAGGATCGACCTTCTGTGCCGAGTTAAC<br/> GCAATAAGTACCCCGCTGGGGAGTACGACCGCAAGGTTGAAAACCAAAGGA<br/> ATTGACGGGGGCCCGCACAAAGCGGTGGAGTATGTGGTTAATTTCGACGCAAC<br/> GCGAAGAACCTTACCAGGTCTTGACATTGATGGACAGAACTAGAGATAGTTCC<br/> TCTTCTCGGAAGCCAGAAAACAGGTGGTGCACGGTTGTGCTCAGCTCGTGT<br/> GTGAGATGTTGGGTTAAGTCCCGCAACGAGCGCAACCCCTATCTTATGTTGCC<br/> AGCACTAAGGTGGGAACTCATGAGAGACTGCCGACAGCAATGCGGAGGAAG<br/> GCGGGGATGACGTCAAATCATCATGCCCTTATGACCTGGGCTACACACGTAC<br/> TACAATGGGCTTATAAAGGGAAGCGAAGTCCGAGGGCGGAGCAAACCCAG<br/> AAACAAGCTCTCAGTTCGGATCGTAGGCTGCAACTCGCCTACGTGAAGTCGGA<br/> ATCGCTAGTAATCGCAGGTCAGATACTGCGGTGAATACGTTCCCGGGCCTTGT<br/> ACACACCGCCCGTACACCACGAAAGTCGGAAGTCCCAAAGCCGG</p> |
| 585419 | <i>g_Veillonella</i>   | <i>uclassified</i>               | -   | <p>ATGGGAGCTTGCTCCTATCATCTTAGTGGCGAACGGGTGAGTAACCGTAATC<br/> ACCTGCCCTTCAATGGGGGACAACAGTTGGAACGACTGCTAATACCGCATA<br/> GTCGGCATCGAGAAAGGTGGCCTTTTTAAAGCTATCGTTGAAGGAGGGGATTG<br/> CGTCTGATTAGCTAGTTGGAGGGGTAACGGCCCAACCAAGGCAATGATCAGTA<br/> GCCGGTCTGAGAGGATGAACGGCCACATTGGGACTGAGACACGGCCAACT<br/> CCTACGGGAGGCAGCAGTGGGAATCTTCCGCAATGGACGAAAGTCTGACCG<br/> AGCAACGCCGCGTGAGTGATGAAGGTCTTCGGATTGTAAGGCTCTGTTAATCG<br/> GGACGAAGAGCCTAGTGTGAATAATGCTAGGAAGTGACGGTACCGGAATAGA<br/> AAGCCACGGCTAACTACGTGCCAGCAGCCGCGTAATACGTAGGTGGCAAGC<br/> GTTGTCCGGAATTATTGGGCGTAAAGCGCGCGCAGGCGGATCTGCCAGTCTGT<br/> CTTAAAAGTTCGGGGCTTAACCCCGTGATGGGATGGAACTACAGATCTAGA<br/> GTATCGGAGAGGAAAAGTGAATTCCTAGTGTAGCGGTGAAATGCGTAGATAT<br/> TAGGAAGAACACCAGTGGCGAAGGCGACTTTCTGGACGAAAACGACGCTGA<br/> GGCGCGAAAGCCAGGGGAGCGAACGGGATTAGATACCCCGGTAGTCTGGCC<br/> GTAAACGATGGGTACTAGGTGTAGGAGGATCGACCTTCTGTGCCGAGTTAAC<br/> GCAATAAGTACCCCGCTGGGGAGTACGACCGCAAGGTTGAAAACCAAAGGA<br/> ATTGACGGGGGCCCGCACAAAGCGGTGGAGTATGTGGTTAATTTCGACGCAAC<br/> GCGAAGAACCTTACCAGGTCTTGACATTGATGGACAGAACTAGAGATAGTTCC<br/> TCTTCTCGGAAGCCAGAAAACAGGTGGTGCACGGTTGTGCTCAGCTCGTGT<br/> GTGAGATGTTGGGTTAAGTCCCGCAACGAGCGCAACCCCTATCTTATGTTGCC<br/> AGCACTAAGGTGGGAACTCATGAGAGACTGCCGACAGCAATGCGGAGGAAG<br/> GCGGGGATGACGTCAAATCATCATGCCCTTATGACCTGGGCTACACACGTAC<br/> TACAATGGGCTTATAAAGGGAAGCGAAGTCCGAGGGCGGAGCAAACCCAG<br/> AAACAAGCTCTCAGTTCGGATCGTAGGCTGCAACTCGCCTACGTGAAGTCGGA<br/> ATCGCTAGTAATCGCAGGTCAGATACTGCGGTGAATACGTTCCCGGGCCTTGT<br/> ACACACCGCCCGTACACCACGAAAGTCGGAAGTCCCAAAGCCGG</p>                                                                                                                                                                                                                                                                                                                                                                                                                                                                                                                                                                                                                                                                                                                                                                                                                                                                                                                                                                                                                                                                                                                                                                                                                                                                                                                                                                                                                                                                                                                                                                                                                                                                                     |

|        |                      |                                    |       |                                                                                                                                                                                                                                                                                                                                                                                                                                                                                                                                                                                                                                                                                                                                                                                                                                                                                                                                                                                                                                                                                                                                                                                                                                                                                                                                                                                                                                                                                                                                                                 |
|--------|----------------------|------------------------------------|-------|-----------------------------------------------------------------------------------------------------------------------------------------------------------------------------------------------------------------------------------------------------------------------------------------------------------------------------------------------------------------------------------------------------------------------------------------------------------------------------------------------------------------------------------------------------------------------------------------------------------------------------------------------------------------------------------------------------------------------------------------------------------------------------------------------------------------------------------------------------------------------------------------------------------------------------------------------------------------------------------------------------------------------------------------------------------------------------------------------------------------------------------------------------------------------------------------------------------------------------------------------------------------------------------------------------------------------------------------------------------------------------------------------------------------------------------------------------------------------------------------------------------------------------------------------------------------|
| 324786 | <i>g_Veillonella</i> | <i>Veillonella creceti / ratti</i> | 97.19 | AGAGTTTGATCCTGGCTCAGGACGAACGCTGGCGGCGTGCTTAACACATGCAA<br>GTCGAACGGAGAGCGATGGAAGCTTGCTTCTATCAATCTTAGTGCGAACGG<br>GTGAGTAACCGCTAACCAACCTGCCCTCAGAGGGGGATAACCAACGGGAAAC<br>CGTTGCTAATACCGGTACGATTAAGCTTCGGCATCGAAGCTTAATGAAAGGT<br>GGCCTCTATATAAAGCTATCGCTGAAGGAGGGGGTTGCGTCTGATTAGCTAG<br>TTGGAGGGTAACGGCCACCAAGGCAATGATCAGTAGCCGGTCTGAGAGGA<br>TGAACGGCCACATTGGGACTGAGACACGGCCAAACTCTACGGGAGGCAGC<br>AGTGGGGAATCTCCGCAATGGACGAAAGTCTGACGGAGCAACGCCCGGTGA<br>GTGATCACGGCCTTCGGGTGTAAAGCTCTGTTAATCGGGACGAATGGTCTTT<br>GTGTGAACAATGCAAAGATTTGACGGTACCGGAATAGAAAGCCACGGCTAAC<br>TACGTGCCAGCAGCCGAGTAATACGTAGGTGGCAAGCGTTTCCGGAATTAT<br>TGGGCGTAAAGCGCGCGCAGGCGGTTTTGCAAGTCTGTCTTAAAAGTTCGGGG<br>CTCAACCCCGTGATGGGATGGAAACTGTGGAAGTAGAGTATCGGAGAGGAAA<br>GCGGAATTCCTAGTGTAGCGGTGAAATGCGTAGATATTAGGAAGAACCACAG<br>TGGCGAAGCGGCTTTCTGGACGACAACTGACGCTGAGGCGCGAAAGCCAGG<br>GGAGCGAACGGGATTAGATACCCCGGTAGTCTGGCCGTAAACGATGGGTAC<br>TAGGTGTAGGAGGTATCGACCCCTTTGTGCCGGAGTTGACGCAATAAGTACC<br>CCGCTGGGGAGTACGGTTCGACGGGTGAAACTCTAAGGAATTGACGGGGGC<br>CCGCACACGGGTGGAGTACGTGGTTAATTTGACGCAACGCGAAGGCCCTT<br>CCAGGTCTCGACACTGATGGACGAAACAAGAGATTGTTTTCTCCCTCGGGAG<br>CCAGAAAACAGGTGGTGCACGGCTGTCGTACGCTCGTGTGAGATGTTGGG<br>TTAAGTCCCGCAACGAGCGCAACCCCTATCTTATGTTGCCAGCACTTCGGGTG<br>GAACTCATGAGAGACTGCCGACGACAATGCGGAGGAAGCGGGGATGACG<br>TCAAGTCATCATGCCCTTATGACCTGGGCTACACACTACTACAATAGGCTT<br>TAATAGAGGGACGCGAAGCCGCGAGGTGGAGCAAACCCAGAAAACAAGTCTT<br>CAGTTCGGATCGTAGGCTGCAACTCGCTACGTGAAGTCCGGAATCGCTAGTAA<br>TCGACGGTCAGCATACTGCGGTGAATACGTTCCCGGCCTTGACACACCCGCC<br>CGTCA |
|--------|----------------------|------------------------------------|-------|-----------------------------------------------------------------------------------------------------------------------------------------------------------------------------------------------------------------------------------------------------------------------------------------------------------------------------------------------------------------------------------------------------------------------------------------------------------------------------------------------------------------------------------------------------------------------------------------------------------------------------------------------------------------------------------------------------------------------------------------------------------------------------------------------------------------------------------------------------------------------------------------------------------------------------------------------------------------------------------------------------------------------------------------------------------------------------------------------------------------------------------------------------------------------------------------------------------------------------------------------------------------------------------------------------------------------------------------------------------------------------------------------------------------------------------------------------------------------------------------------------------------------------------------------------------------|

---

The major OTUs were arranged in order of abundance at each dietary animal protein medium.

**A**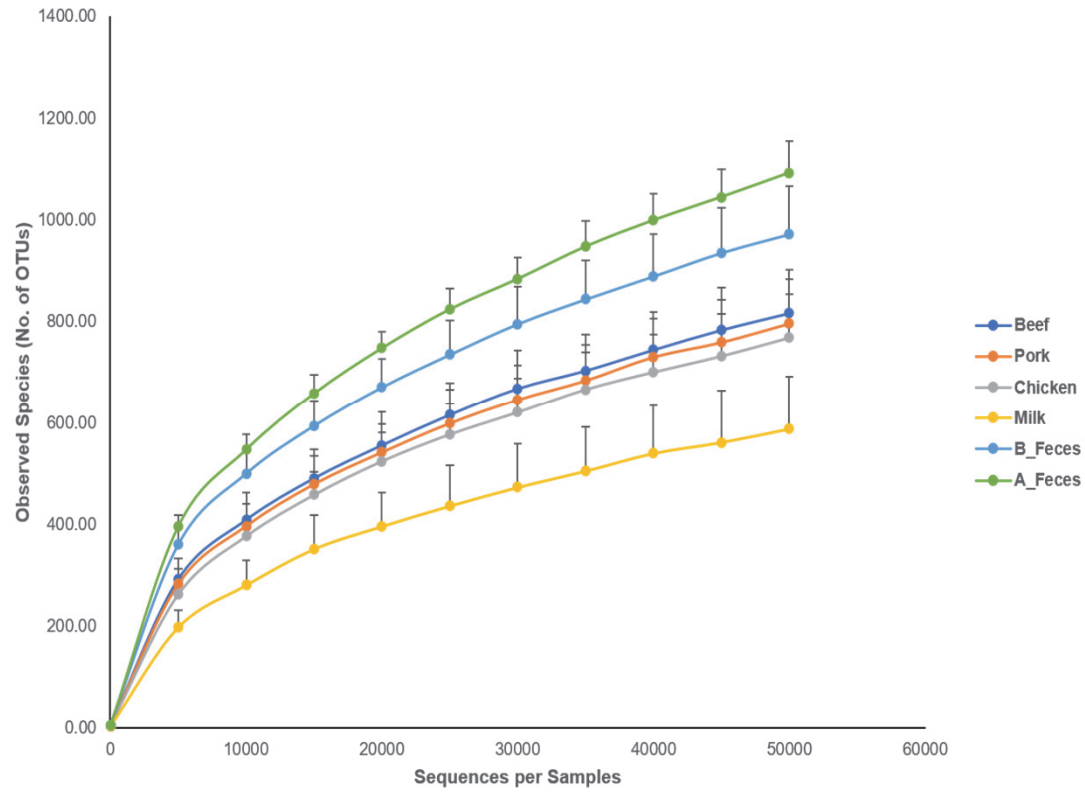**B**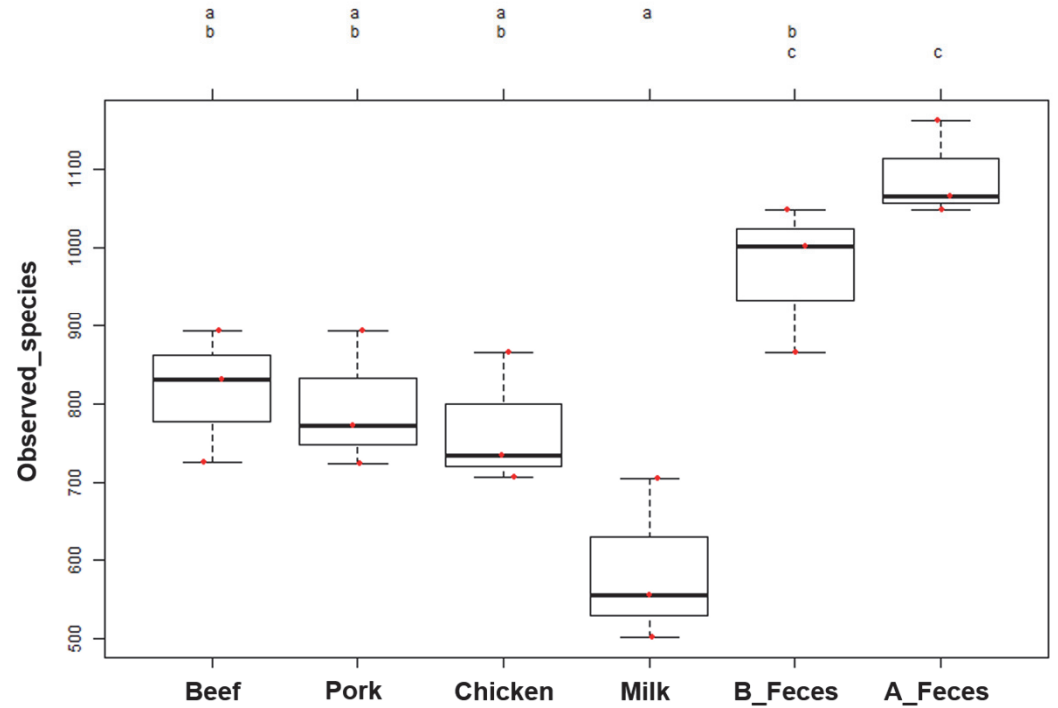

**Figure S1.** Rarefaction analysis observed species (No. of OTUs) from the different animal protein groups. (A) The lines indicate the mean and the error bars represent standard deviations. Colors mean: *blue* Beef, *orange* Pork, *gray* Chicken, *yellow* Milk, *sky blue* B\_Feces, and *green* A\_Feces. (B) This graph shows randomly selected OTUs in 50000 reads. Red dots mean each sample. a, b, c represents that difference is significant at 0.05 level.

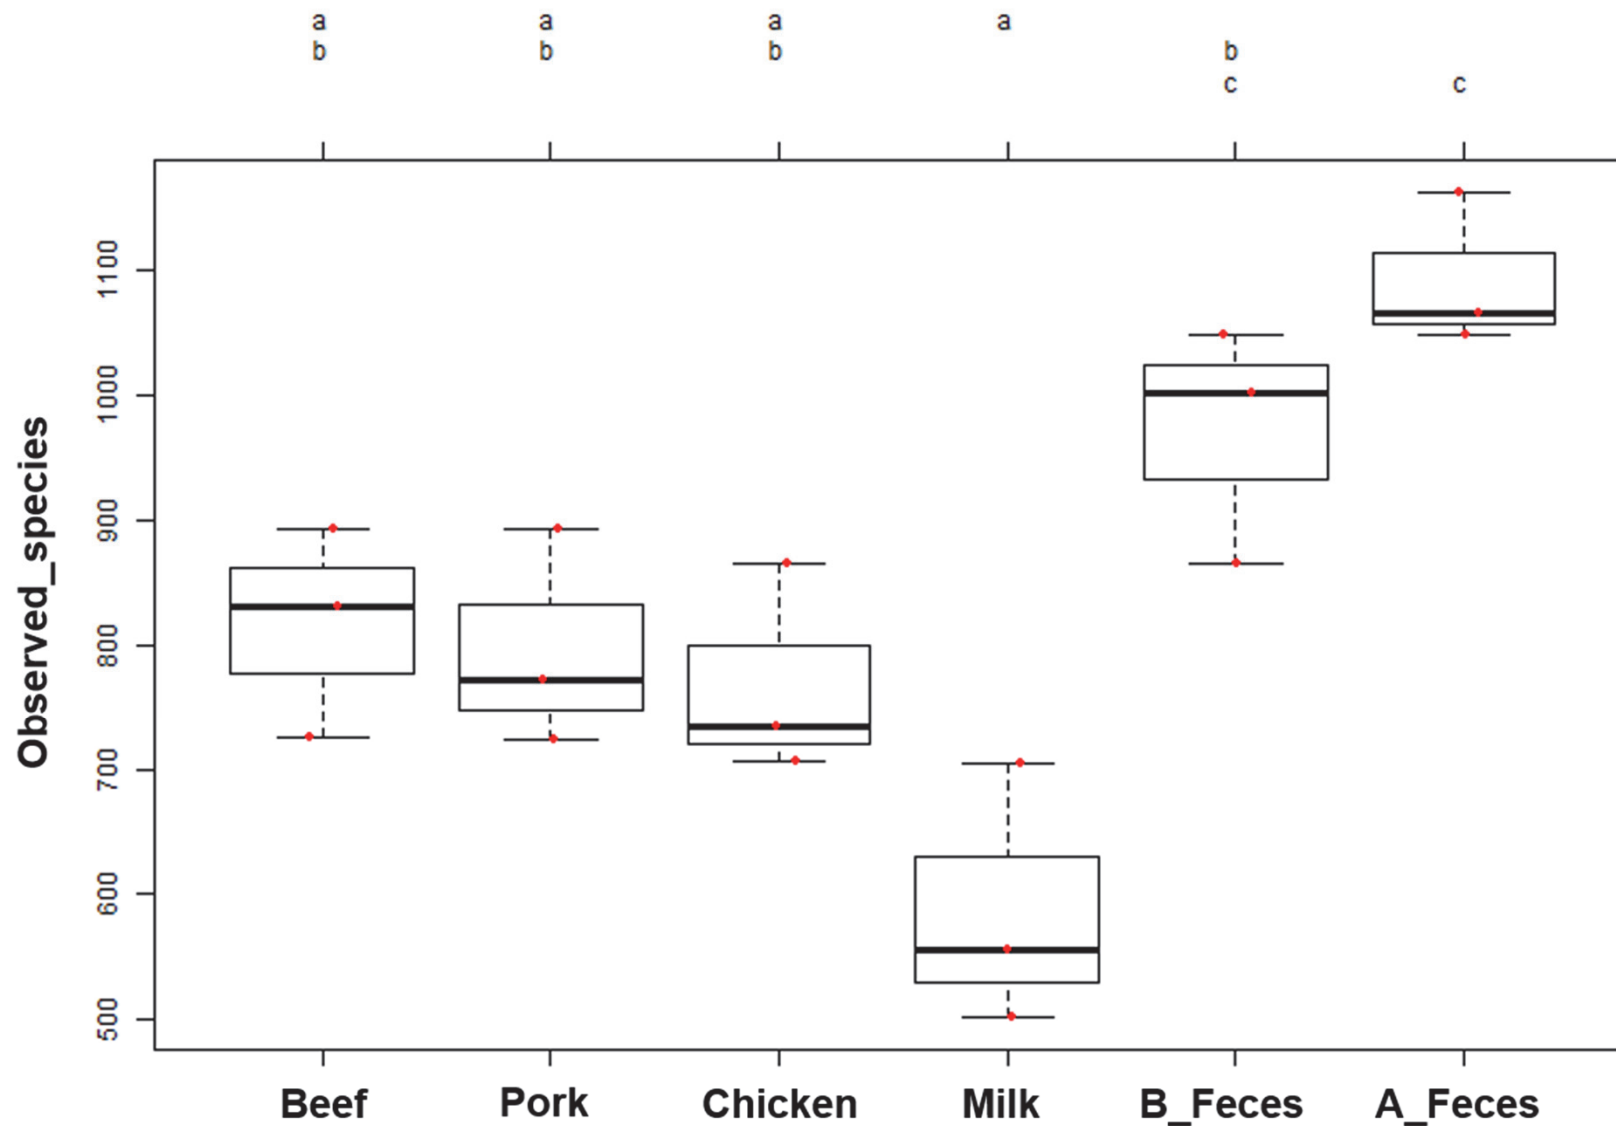

**Figure S2.** Rarefaction analysis observed species (No. of OTUs) from the different animal protein groups. This graph shows randomly selected OTUs in 50000 reads. Red dots mean each sample. a, b, c represents that difference is significant at 0.05 level.
